# Supplementary material for: Structural and Solution Speciation Studies on fac-Tricarbonylrhenium(I) Complexes of 2,2′-Bipyridine Analogues
Source: PubMed Central journal article supplement (PMC11541514; doi:10.1021/acsomega.4c07117), 2024-10-26
Supplement: ao4c07117_si_001.pdf [file ao4c07117_si_001.pdf]

## Supporting Information

### Structural and solution speciation studies on fac-tricarbonylrhenium(I) complexes of 2,2'-bipyridine analogues

*Tamás Pivarcsik<sup>1,2</sup>, Jakob Kljun<sup>3</sup>, Sergio Clemente Rodriguez<sup>3,4</sup>, David Cortéz Alcaraz<sup>3,4</sup>, Uroš Rapuš<sup>3</sup>, Márta Nové<sup>1,5</sup>, Egon F. Várkonyi<sup>1,2</sup>, József Nyári<sup>5</sup>, Anita Bogdanov<sup>5</sup>, Gabriella Spengler<sup>1,5</sup>, Iztok Turel<sup>3,\*</sup>, Éva A. Enyedy<sup>1,2,\*</sup>*

<sup>1</sup> *MTA-SZTE Lendület Functional Metal Complexes Research Group, University of Szeged, Dóm tér 7-8., H-6720 Szeged, Hungary, \* Email: enyedy@chem.u-szeged.hu*

<sup>2</sup> *Department of Molecular and Analytical Chemistry, Interdisciplinary Excellence Centre, University of Szeged, Dóm tér 7-8., H-6720 Szeged, Hungary*

<sup>3</sup> *Faculty of Chemistry and Chemical Technology, University of Ljubljana, Večna pot 113, SI-1000 Ljubljana, Slovenia, \* Email: Iztok.Turel@fkkt.uni-lj.si*

<sup>4</sup> *Universidad de Alcalá, 28805 Alcalá de Henares, Madrid, Spain*

<sup>5</sup> *Department of Medical Microbiology, Albert Szent-Györgyi Health Center and Albert Szent-Györgyi Medical School, University of Szeged, Semmelweis u. 6, H-6725 Szeged, Hungary*

## Supporting Information

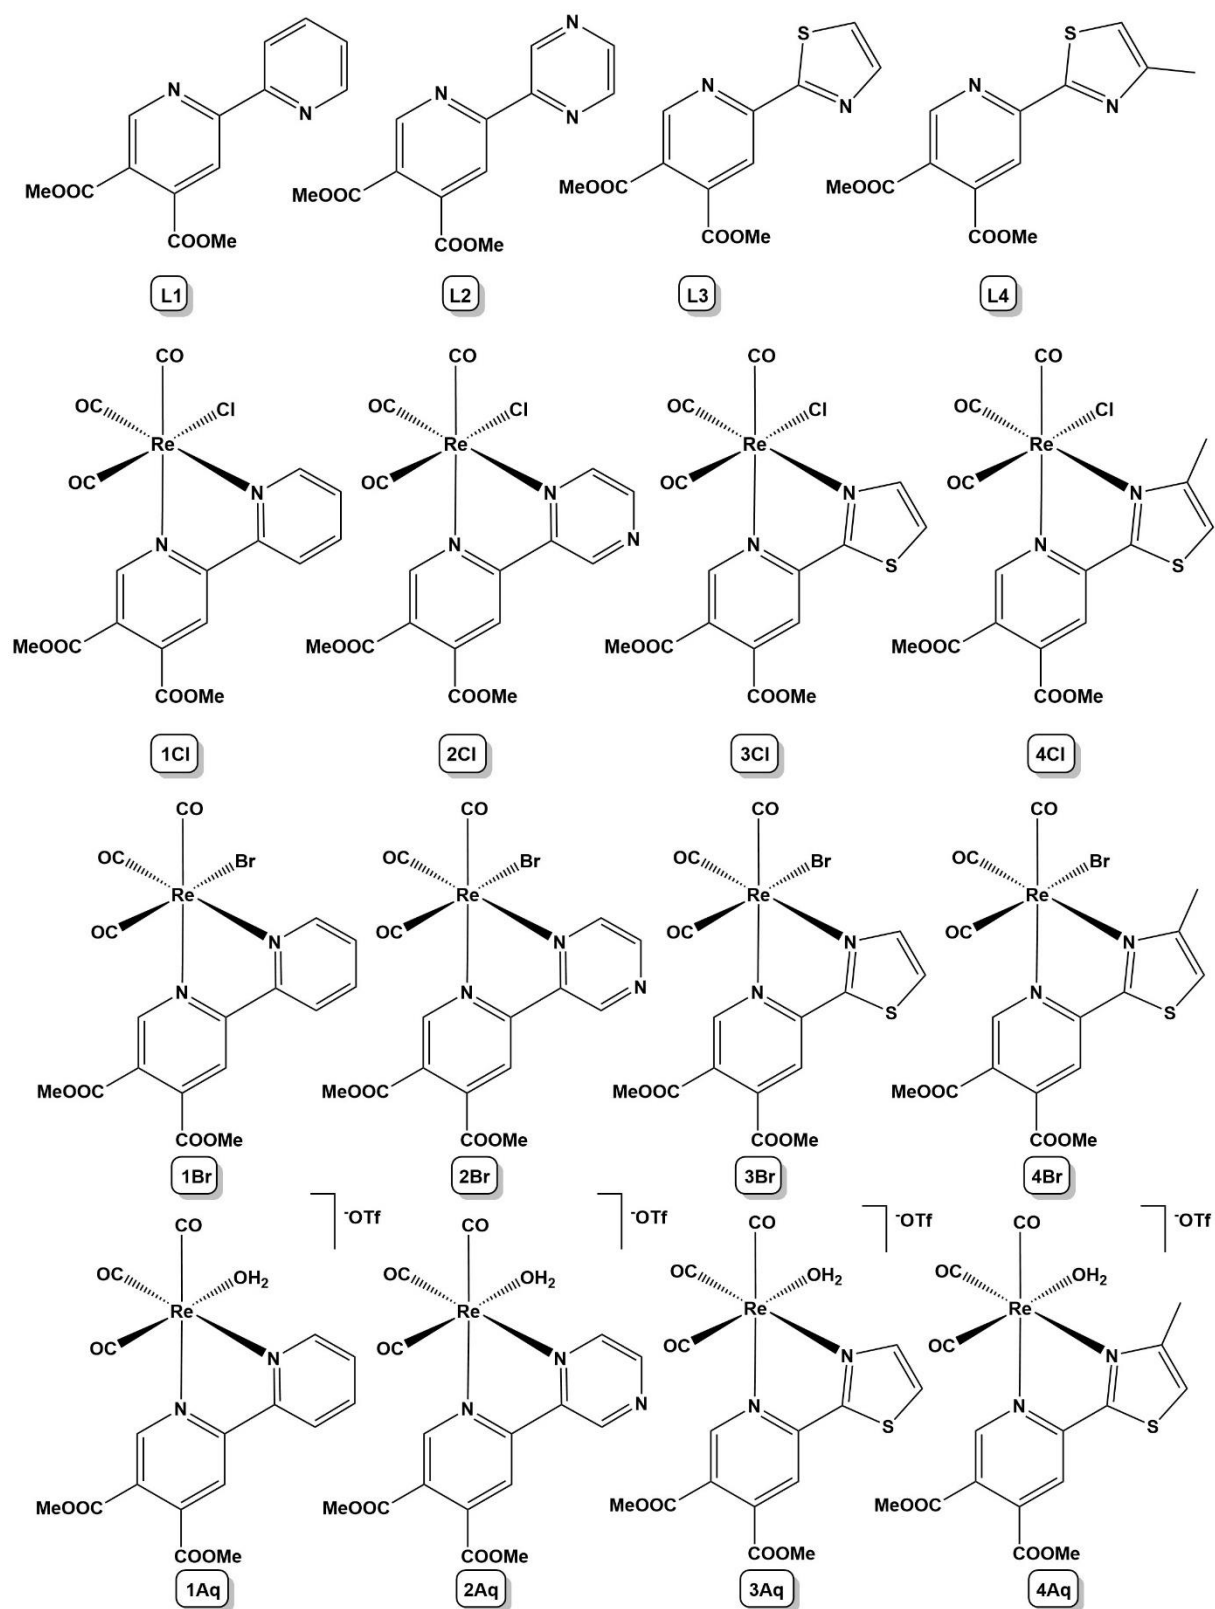

**Chart S1.** Chemical structure of the ligands **L1-4** and the *fac*-[Re(CO)<sub>3</sub>] complexes prepared with labels.

## Supporting Information

In the NMR spectra peaks of solvents can be observed besides the peaks for the compounds. Solvents present are mainly toluene (used as solvent for the reaction), acetone (used to clean NMR tubes) and silicon grease (from the NMR machine).

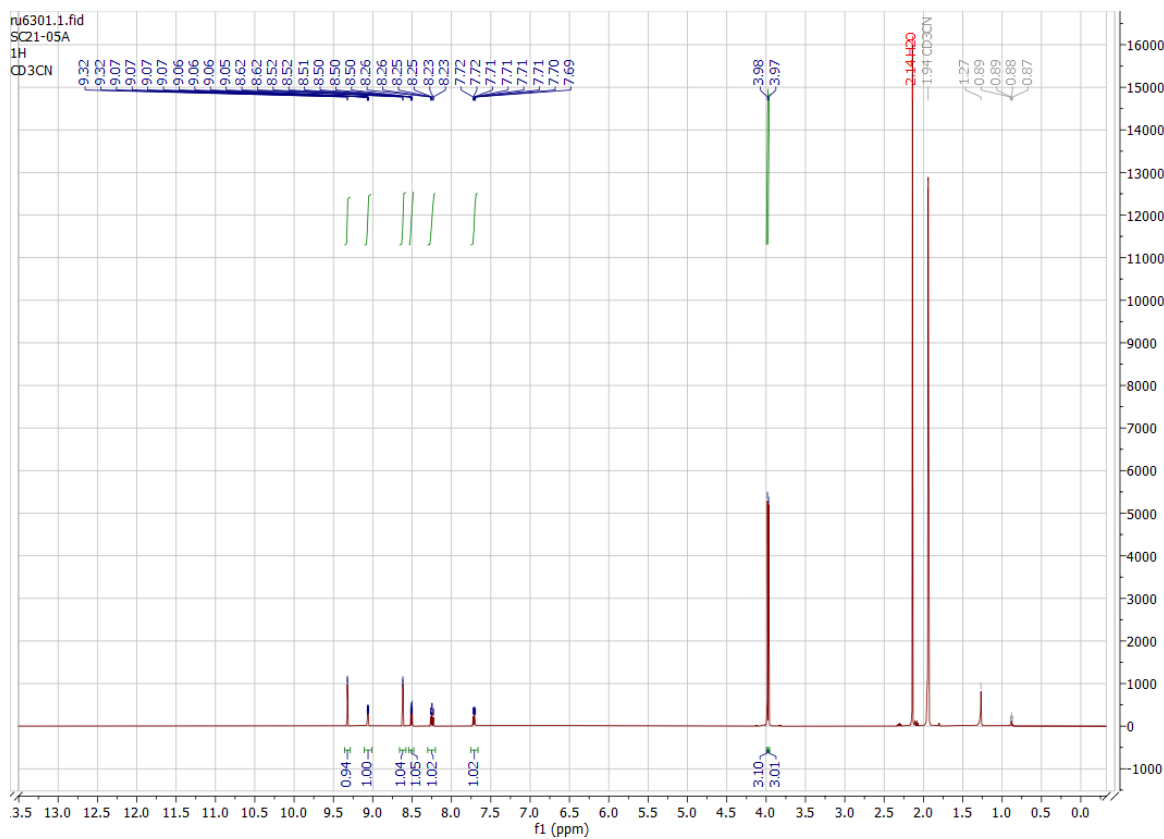

Figure S1.  $^1\text{H}$  NMR of 1Cl.

## Supporting Information

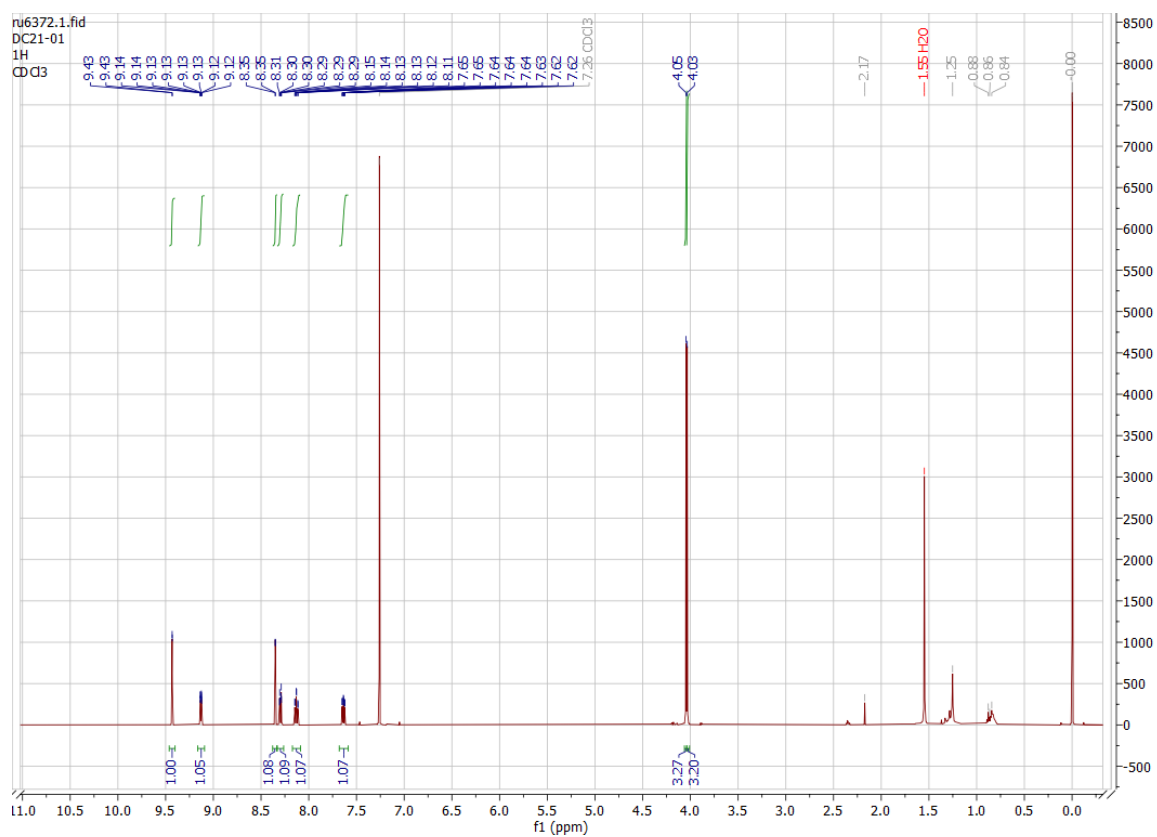

Figure S2.  $^1\text{H}$  NMR of 1Br.

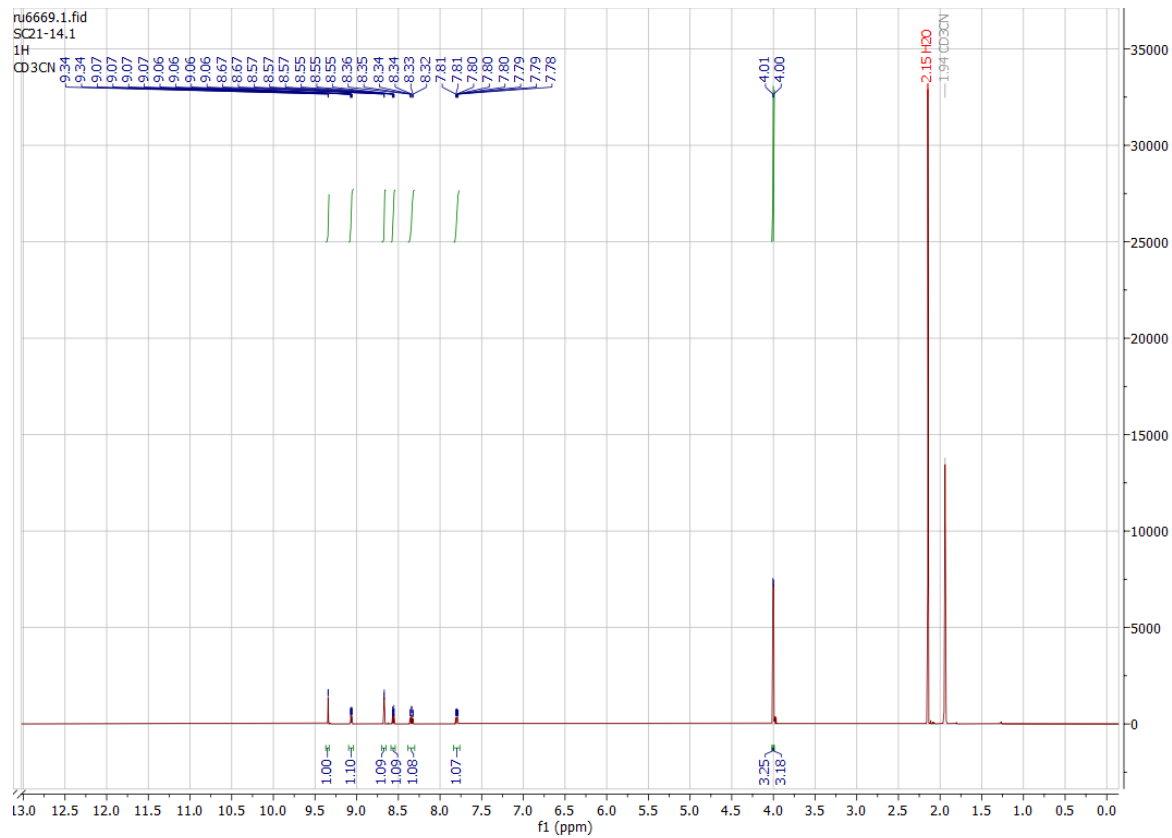

Figure S3.  $^1\text{H}$  NMR of 1Aq.

## Supporting Information

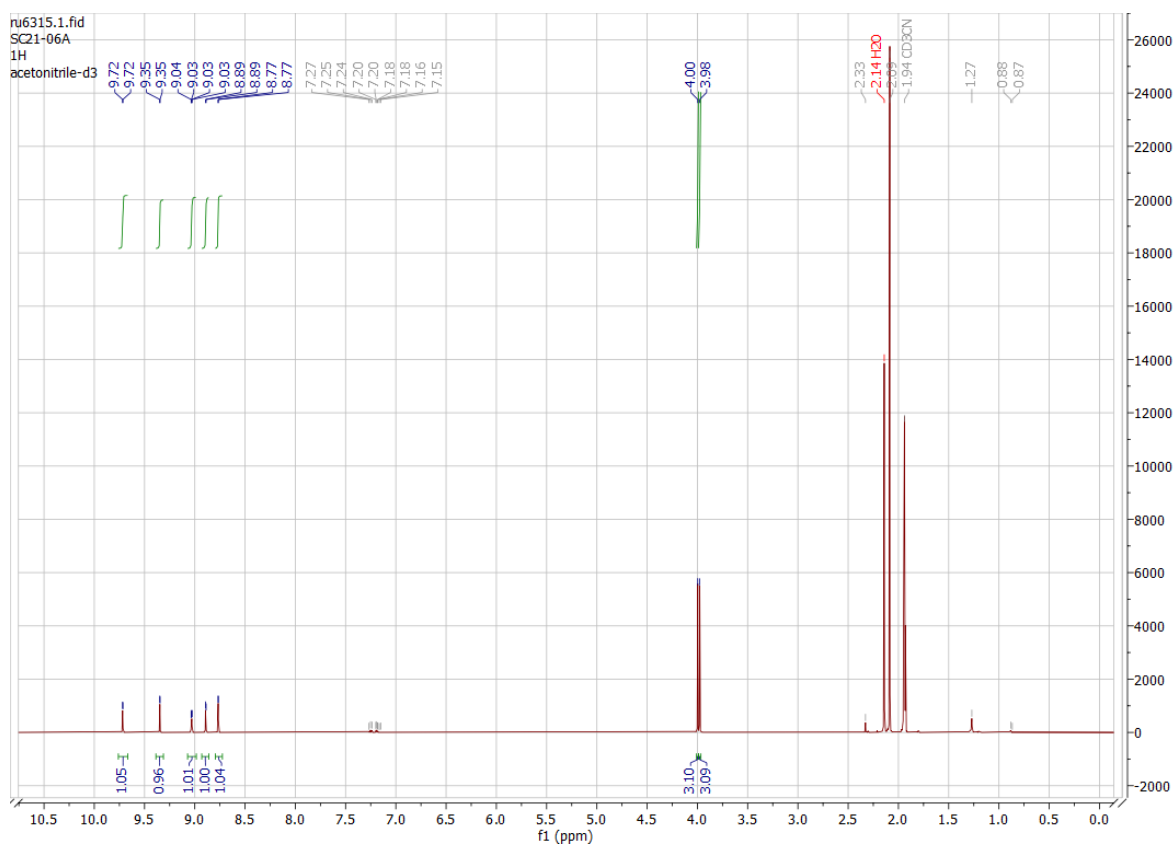

Figure S4. <sup>1</sup>H NMR of 2Cl.

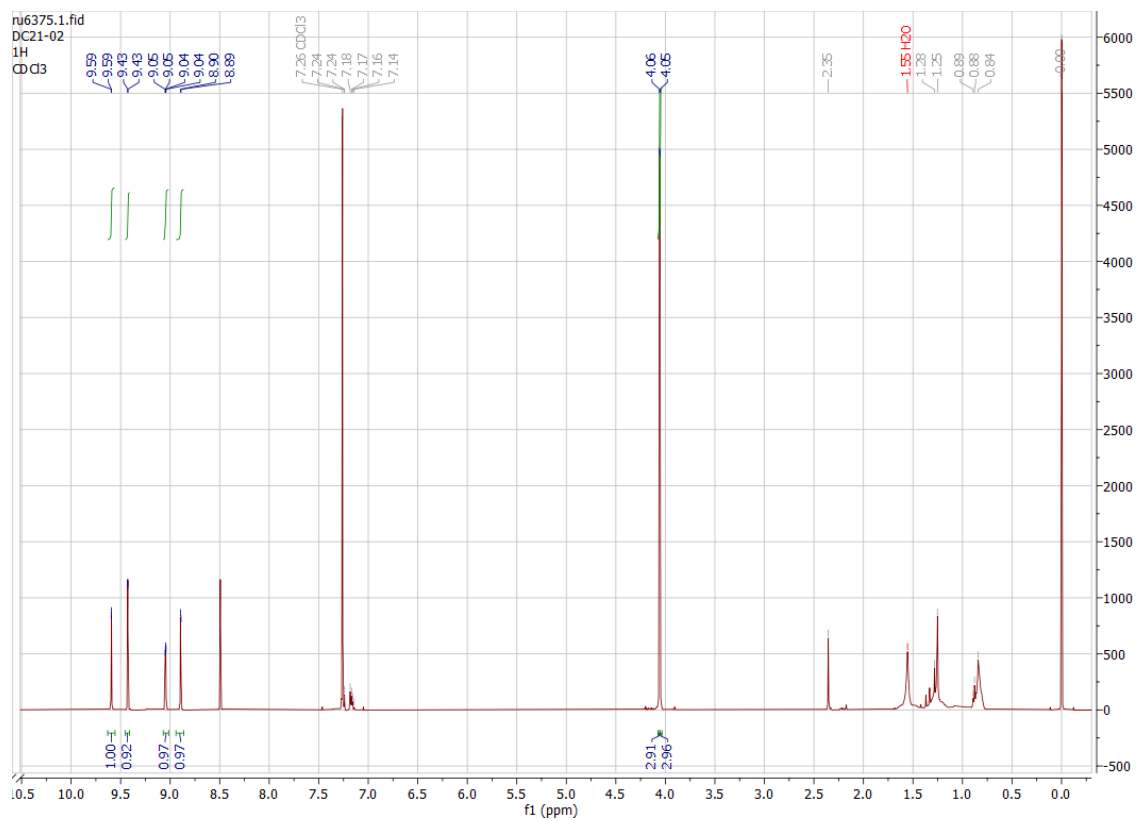

Figure S5. <sup>1</sup>H NMR of 2Br.

## Supporting Information

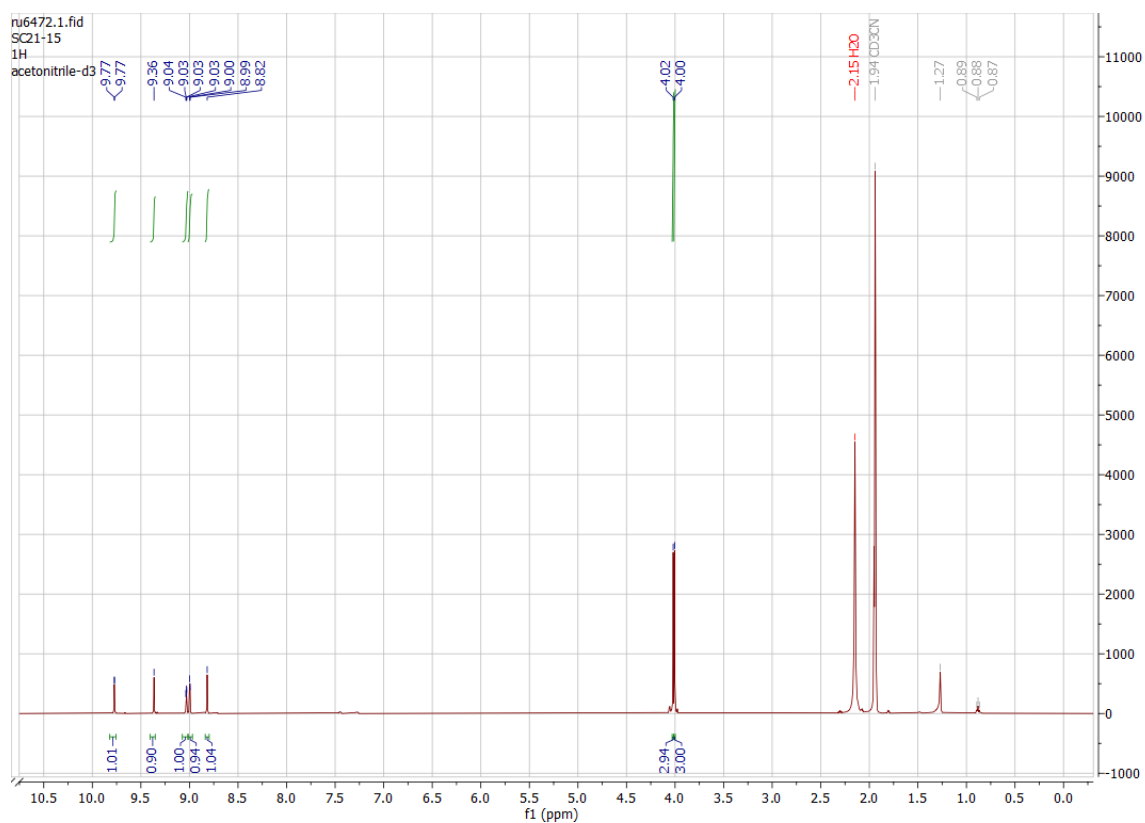

Figure S6. <sup>1</sup>H NMR of 2Aq.

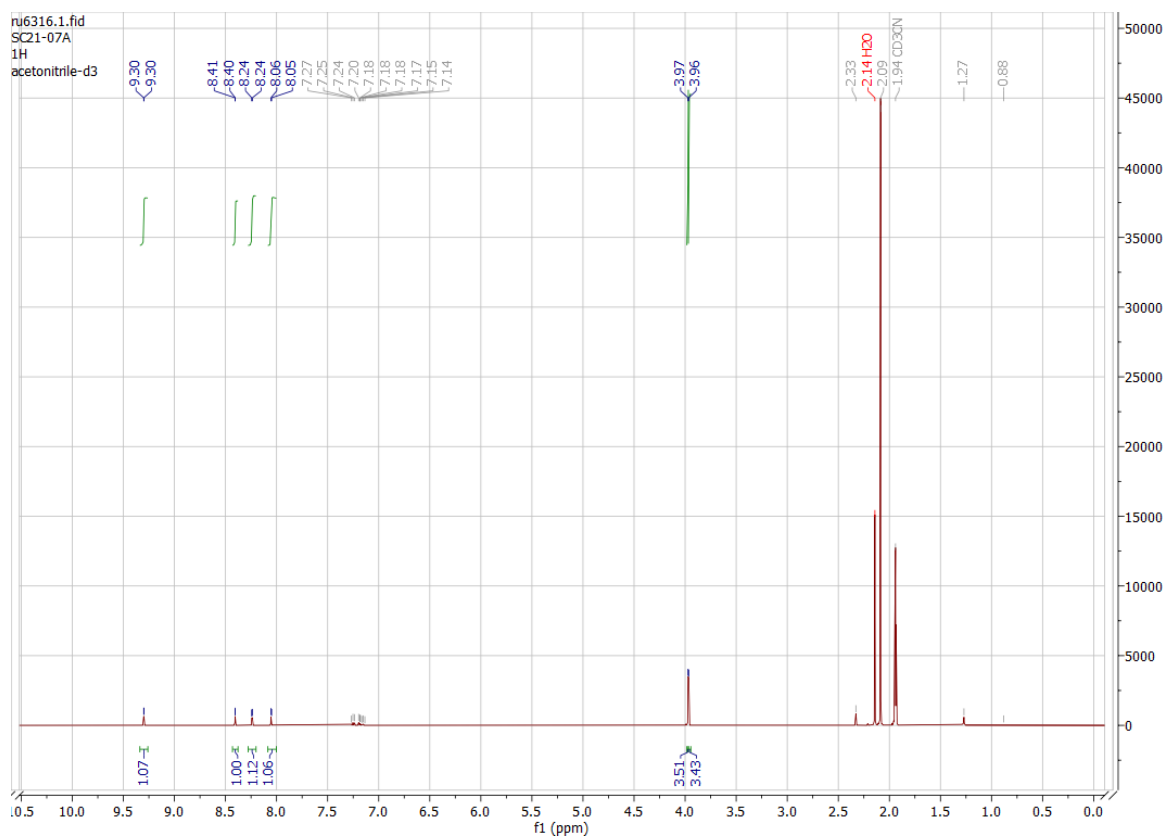

Figure S7. <sup>1</sup>H NMR of 3Cl.

## Supporting Information

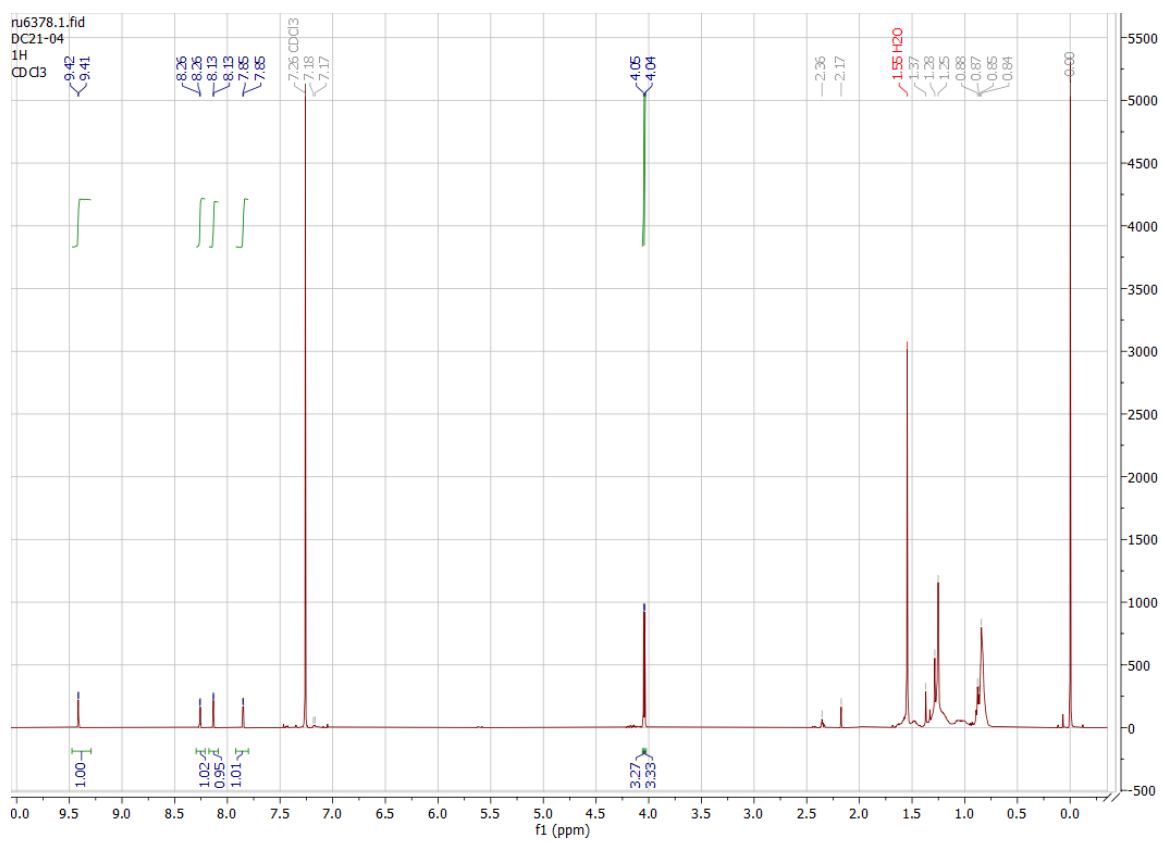

Figure S8.  $^1\text{H}$  NMR of 3Br.

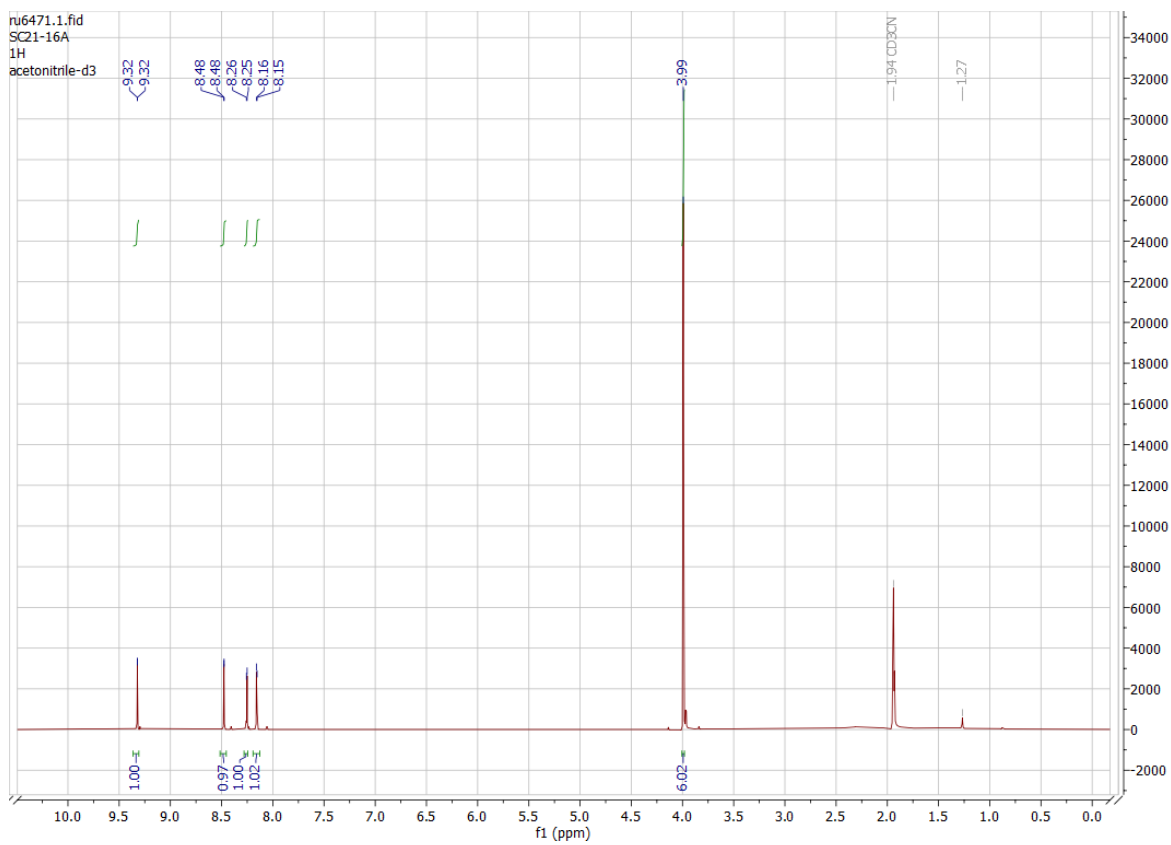

Figure S9.  $^1\text{H}$  NMR of 3Aq.

## Supporting Information

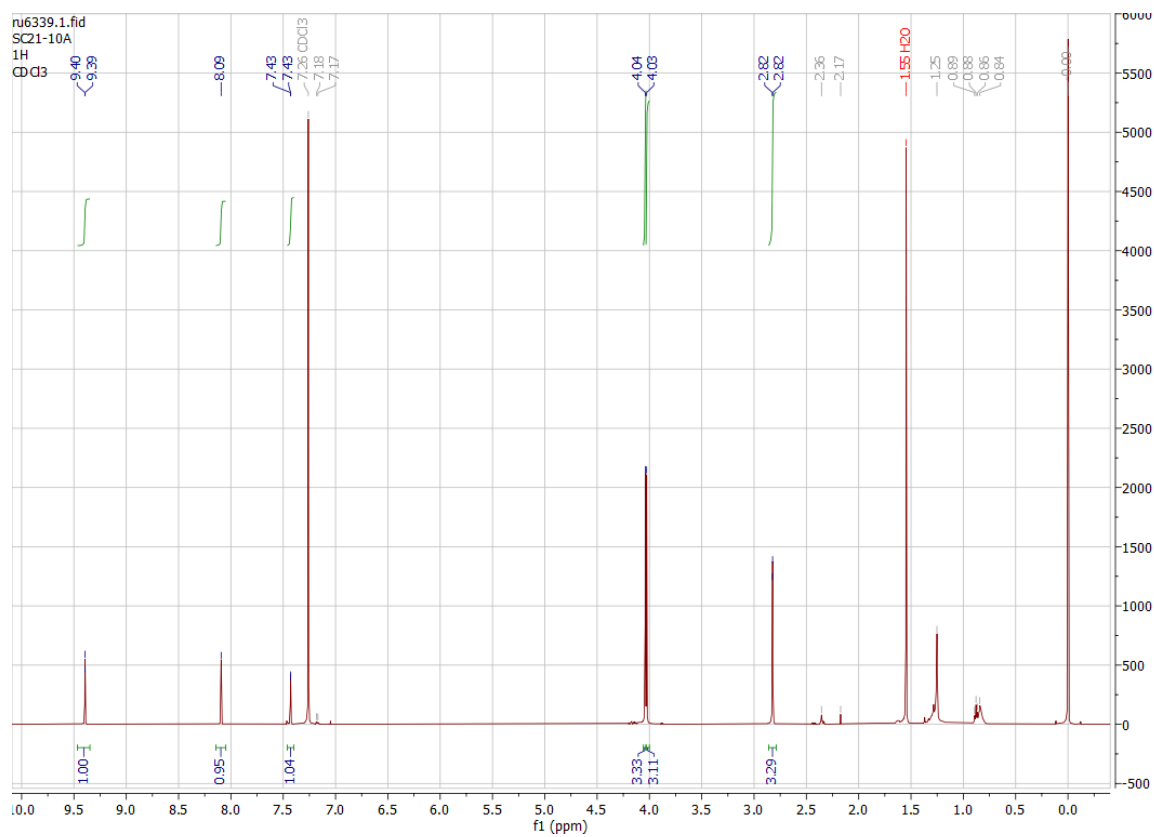

Figure S10.  $^1\text{H}$  NMR of 4Cl.

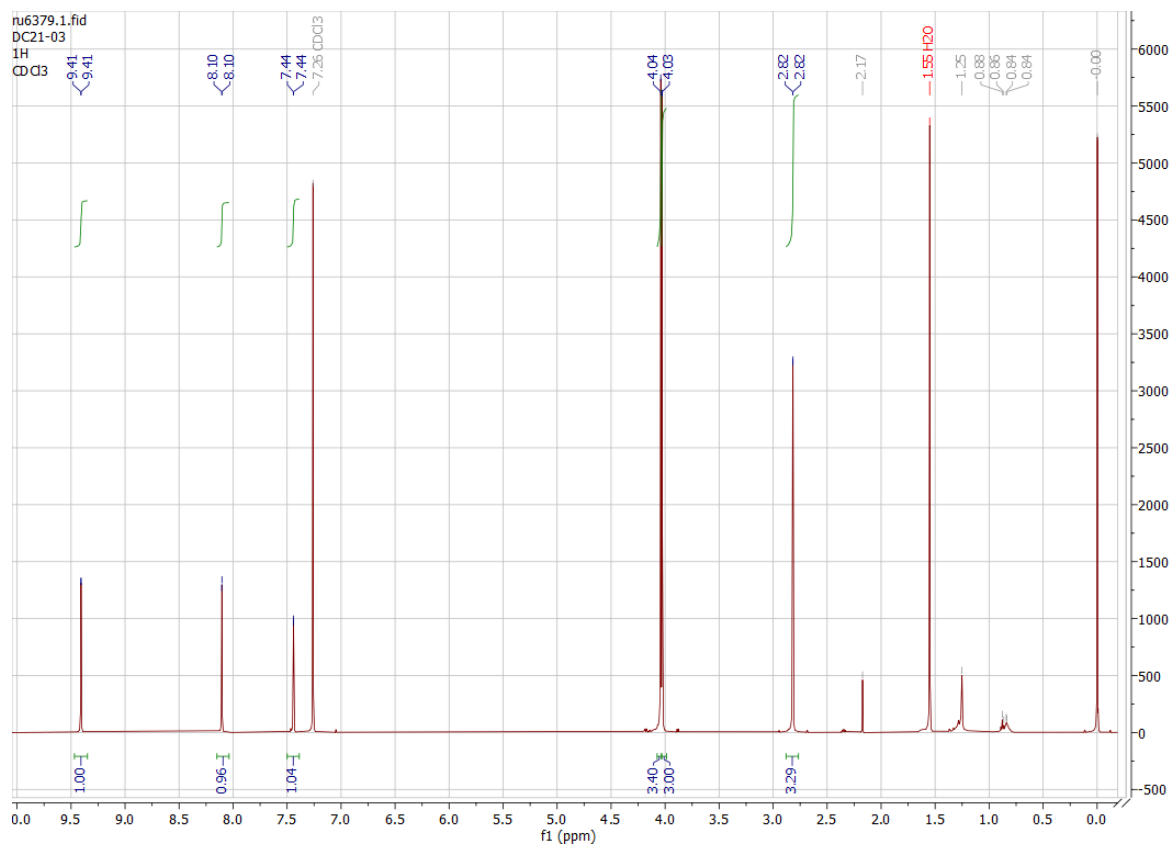

Figure S11.  $^1\text{H}$  NMR of 4Br.



## Supporting Information

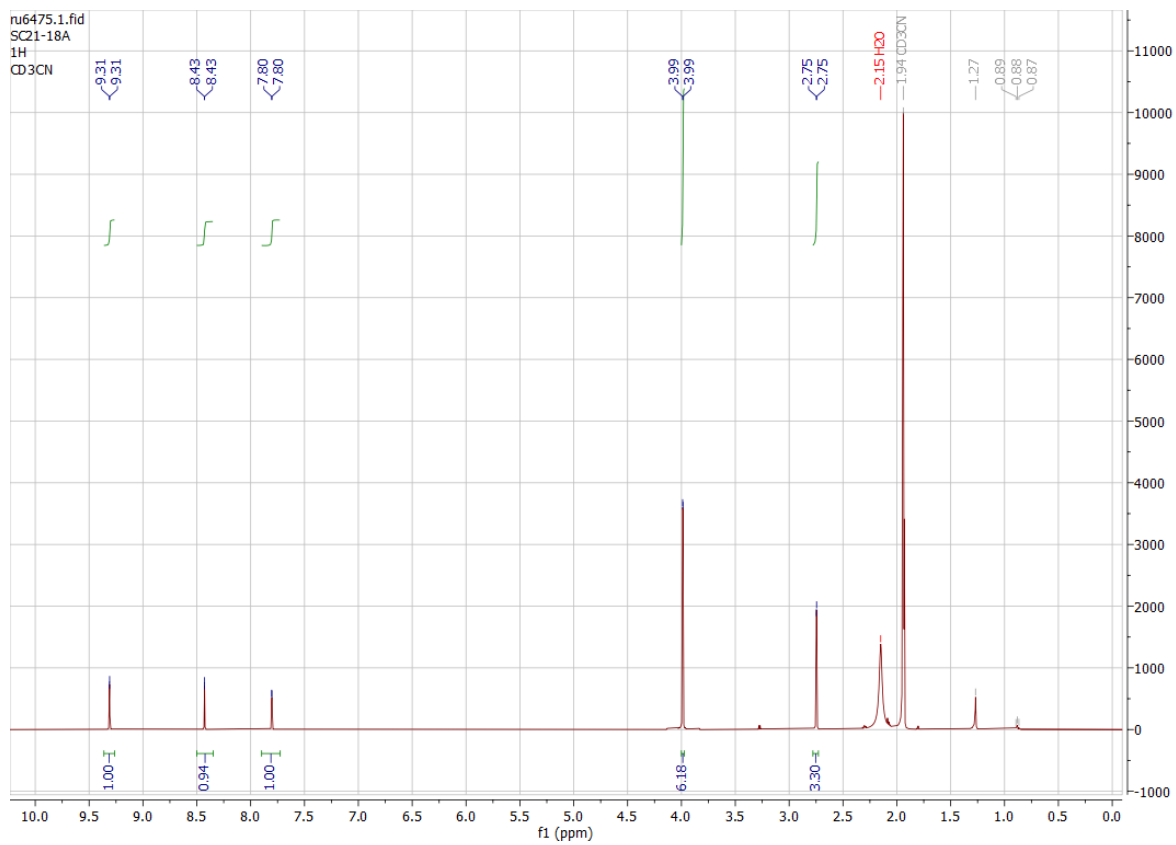

Figure S12. <sup>1</sup>H NMR of 4Aq.

## Supporting Information

**Table S1.** Pictures of the analyzed single crystals.<sup>a</sup>

|    | 1                                                                                  | 2                                                                                 | 3                                                                                   | 4                                                                                   |
|----|------------------------------------------------------------------------------------|-----------------------------------------------------------------------------------|-------------------------------------------------------------------------------------|-------------------------------------------------------------------------------------|
| Cl |                                                                                    | 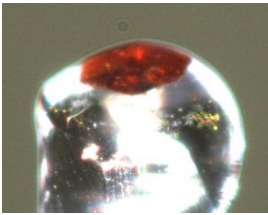 |   |  |
| Br |                                                                                    |                                                                                   |   |  |
| Aq |  |                                                                                   |  |  |

<sup>a</sup> The structure of **3Cl** contains a large solvent accessible void of 224 Å<sup>3</sup> with an integrated residual electron density of 24 e<sup>-</sup>. Attempts to place a solvent molecule (acetone or multiple water molecules) were not successful.

## Supporting Information

**Table S2.** Crystallographic data for complexes **2Cl**, **3Cl**, and **4Cl**.

| Compound                                       | <b>2Cl</b>                                                                                     | <b>3Cl</b>                                                          | <b>4Cl</b>                                                          |
|------------------------------------------------|------------------------------------------------------------------------------------------------|---------------------------------------------------------------------|---------------------------------------------------------------------|
| CCDC No.                                       | 2366664                                                                                        | 2366665                                                             | 2366666                                                             |
| Sample code                                    | mod25_auto                                                                                     | mod12_auto                                                          | mod28_auto                                                          |
| Empirical formula                              | C <sub>32</sub> H <sub>22</sub> Cl <sub>2</sub> N <sub>6</sub> O <sub>14</sub> Re <sub>2</sub> | C <sub>15</sub> H <sub>10</sub> ClN <sub>2</sub> O <sub>7</sub> ReS | C <sub>16</sub> H <sub>12</sub> ClN <sub>2</sub> O <sub>7</sub> ReS |
| Formula weight                                 | 1157.85                                                                                        | 583.96                                                              | 597.99                                                              |
| Temperature [K]                                | 150.00(10)                                                                                     | 150.00(10)                                                          | 150.00(10)                                                          |
| Crystal system                                 | triclinic                                                                                      | monoclinic                                                          | triclinic                                                           |
| Space group                                    | P-1                                                                                            | P2 <sub>1</sub> /n                                                  | P-1                                                                 |
| a [Å]                                          | 12.6956(3)                                                                                     | 11.0635(3)                                                          | 9.8309(4)                                                           |
| b [Å]                                          | 12.9333(3)                                                                                     | 8.0622(2)                                                           | 10.0620(3)                                                          |
| c [Å]                                          | 13.6408(4)                                                                                     | 24.6138(6)                                                          | 10.3204(4)                                                          |
| α [°]                                          | 64.949(3)                                                                                      | 90                                                                  | 89.429(3)                                                           |
| β [°]                                          | 66.006(3)                                                                                      | 101.704(2)                                                          | 71.172(4)                                                           |
| γ [°]                                          | 89.370(2)                                                                                      | 90                                                                  | 78.930(3)                                                           |
| Volume [Å <sup>3</sup> ]                       | 1818.24(10)                                                                                    | 2149.81(10)                                                         | 946.79(6)                                                           |
| Z                                              | 2                                                                                              | 4                                                                   | 2                                                                   |
| ρ <sub>calc</sub> [g cm <sup>-3</sup> ]        | 2.115                                                                                          | 1.804                                                               | 2.098                                                               |
| μ [mm <sup>-1</sup> ]                          | 6.876                                                                                          | 5.909                                                               | 6.711                                                               |
| F(000)                                         | 1104.0                                                                                         | 1112.0                                                              | 572.0                                                               |
| Crystal size [mm <sup>3</sup> ]                | 0.1 × 0.1 × 0.05                                                                               | 0.2 × 0.025 × 0.025                                                 | 0.25 × 0.25 × 0.1                                                   |
| Radiation                                      | Mo Kα<br>(λ = 0.71073)                                                                         | Mo Kα<br>(λ = 0.71073)                                              | Mo Kα<br>(λ = 0.71073)                                              |
| 2θ range for data collection [°]               | 5.508 to 54.958                                                                                | 5.328 to 54.962                                                     | 5.446 to 54.968                                                     |
| Index ranges                                   | -16 ≤ h ≤ 16,<br>-16 ≤ k ≤ 16,<br>-17 ≤ l ≤ 17                                                 | -14 ≤ h ≤ 14,<br>-10 ≤ k ≤ 10,<br>-31 ≤ l ≤ 31                      | -12 ≤ h ≤ 12,<br>-12 ≤ k ≤ 13,<br>-12 ≤ l ≤ 13                      |
| Reflections collected                          | 34347                                                                                          | 47923                                                               | 8794                                                                |
| Independent reflections                        | 8342<br>[R <sub>int</sub> = 0.0363,<br>R <sub>sigma</sub> = 0.0318]                            | 4936<br>[R <sub>int</sub> = 0.0815,<br>R <sub>sigma</sub> = 0.0442] | 4341<br>[R <sub>int</sub> = 0.0458,<br>R <sub>sigma</sub> = 0.0591] |
| Data/restraints/parameters                     | 8342/0/509                                                                                     | 4936/0/246                                                          | 4341/0/250                                                          |
| Goodness-of-fit on F <sup>2</sup>              | 1.052                                                                                          | 1.107                                                               | 1.025                                                               |
| Final R indexes [I ≥ 2σ (I)]                   | R <sub>1</sub> = 0.0299,<br>wR <sub>2</sub> = 0.0671                                           | R <sub>1</sub> = 0.0368,<br>wR <sub>2</sub> = 0.0818                | R <sub>1</sub> = 0.0319,<br>wR <sub>2</sub> = 0.0650                |
| Final R indexes [all data]                     | R <sub>1</sub> = 0.0400,<br>wR <sub>2</sub> = 0.0725                                           | R <sub>1</sub> = 0.0535,<br>wR <sub>2</sub> = 0.0865                | R <sub>1</sub> = 0.0384,<br>wR <sub>2</sub> = 0.0686                |
| Largest diff. peak / hole [e Å <sup>-3</sup> ] | 3.48/-1.17                                                                                     | 2.14/-0.87                                                          | 2.50/-1.68                                                          |

## Supporting Information

**Table S3.** Crystallographic data for complexes **3Br** and **4Br**.

| Compound                                       | <b>3Br·toluene</b>                                                  | <b>4Br</b>                                                          |
|------------------------------------------------|---------------------------------------------------------------------|---------------------------------------------------------------------|
| CCDC No.                                       | 2366667                                                             | 2366668                                                             |
| Sample code                                    | moc177                                                              | moc179                                                              |
| Empirical formula                              | C <sub>22</sub> H <sub>18</sub> BrN <sub>2</sub> O <sub>7</sub> ReS | C <sub>16</sub> H <sub>12</sub> BrN <sub>2</sub> O <sub>7</sub> ReS |
| Formula weight                                 | 720.55                                                              | 642.45                                                              |
| Temperature [K]                                | 150.00(10)                                                          | 150.00(10)                                                          |
| Crystal system                                 | monoclinic                                                          | triclinic                                                           |
| Space group                                    | P2 <sub>1</sub> /n                                                  | P-1                                                                 |
| a [Å]                                          | 12.3403(4)                                                          | 10.0127(3)                                                          |
| b [Å]                                          | 8.1416(2)                                                           | 10.1780(3)                                                          |
| c [Å]                                          | 25.0932(7)                                                          | 10.3325(3)                                                          |
| α [°]                                          | 90                                                                  | 87.887(2)                                                           |
| β [°]                                          | 102.897(3)                                                          | 70.324(3)                                                           |
| γ [°]                                          | 90                                                                  | 77.293(2)                                                           |
| Volume [Å <sup>3</sup> ]                       | 2457.51(12)                                                         | 966.42(5)                                                           |
| Z                                              | 4                                                                   | 2                                                                   |
| ρ <sub>calc</sub> [g cm <sup>-3</sup> ]        | 1.948                                                               | 2.208                                                               |
| μ [mm <sup>-1</sup> ]                          | 6.700                                                               | 8.504                                                               |
| F(000)                                         | 1384.0                                                              | 608.0                                                               |
| Crystal size [mm <sup>3</sup> ]                | 0.2 × 0.05 × 0.05                                                   | 0.3 × 0.25 × 0.1                                                    |
| Radiation                                      | Mo Kα<br>(λ = 0.71073)                                              | Mo Kα<br>(λ = 0.71073)                                              |
| 2θ range for data collection [°]               | 5.274 to 54.966                                                     | 4.966 to 54.97                                                      |
| Index ranges                                   | -15 ≤ h ≤ 16,<br>-10 ≤ k ≤ 10,<br>-32 ≤ l ≤ 32                      | -12 ≤ h ≤ 12,<br>-13 ≤ k ≤ 12,<br>-13 ≤ l ≤ 13                      |
| Reflections collected                          | 28107                                                               | 29128                                                               |
| Independent reflections                        | 5585<br>[R <sub>int</sub> = 0.0634,<br>R <sub>sigma</sub> = 0.0552] | 4424<br>[R <sub>int</sub> = 0.0522,<br>R <sub>sigma</sub> = 0.0338] |
| Data/restraints/parameters                     | 5585/0/292                                                          | 4424/0/250                                                          |
| Goodness-of-fit on F <sup>2</sup>              | 0.991                                                               | 1.035                                                               |
| Final R indexes [I ≥ 2σ (I)]                   | R <sub>1</sub> = 0.0334,<br>wR <sub>2</sub> = 0.0566                | R <sub>1</sub> = 0.0311,<br>wR <sub>2</sub> = 0.0712                |
| Final R indexes [all data]                     | R <sub>1</sub> = 0.0537,<br>wR <sub>2</sub> = 0.0603                | R <sub>1</sub> = 0.0366,<br>wR <sub>2</sub> = 0.0748                |
| Largest diff. peak / hole [e Å <sup>-3</sup> ] | 1.32/-1.04                                                          | 2.90/-1.98                                                          |

## Supporting Information

**Table S4.** Crystallographic data for complexes **1Aq**, **3Aq**, and **4Aq**.

| Compound                                       | <b>1Aq</b><br>(methanesulfonate)                                    | <b>3Aq</b><br>(methanesulfonate)                                                | <b>4Aq</b><br>(triflate)                                                                       |
|------------------------------------------------|---------------------------------------------------------------------|---------------------------------------------------------------------------------|------------------------------------------------------------------------------------------------|
| CCDC No.                                       | 2366669                                                             | 2366670                                                                         | 2366671                                                                                        |
| Sample code                                    | mod26_auto                                                          | mod27_auto                                                                      | moc331                                                                                         |
| Empirical formula                              | C <sub>18</sub> H <sub>17</sub> N <sub>2</sub> O <sub>11</sub> SRe  | C <sub>17</sub> H <sub>17</sub> N <sub>2</sub> O <sub>11</sub> ReS <sub>2</sub> | C <sub>17</sub> H <sub>14</sub> F <sub>3</sub> N <sub>2</sub> O <sub>11</sub> ReS <sub>2</sub> |
| Formula weight                                 | 655.59                                                              | 675.64                                                                          | 729.62                                                                                         |
| Temperature [K]                                | 150.00(10)                                                          | 149.5(8)                                                                        | 150.00(10)                                                                                     |
| Crystal system                                 | triclinic                                                           | triclinic                                                                       | triclinic                                                                                      |
| Space group                                    | P-1                                                                 | P-1                                                                             | P-1                                                                                            |
| a [Å]                                          | 9.4962(2)                                                           | 8.0160(2)                                                                       | 9.4366(3)                                                                                      |
| b [Å]                                          | 11.1763(4)                                                          | 11.8334(3)                                                                      | 11.7454(4)                                                                                     |
| c [Å]                                          | 11.4027(4)                                                          | 12.7420(3)                                                                      | 11.8245(4)                                                                                     |
| α [°]                                          | 110.491(3)                                                          | 110.646(2)                                                                      | 65.301(3)                                                                                      |
| β [°]                                          | 92.619(2)                                                           | 94.578(2)                                                                       | 83.502(3)                                                                                      |
| γ [°]                                          | 96.465(2)                                                           | 94.117(2)                                                                       | 89.778(3)                                                                                      |
| Volume [Å <sup>3</sup> ]                       | 1121.69(6)                                                          | 1120.94(5)                                                                      | 1181.67(7)                                                                                     |
| Z                                              | 2                                                                   | 2                                                                               | 2                                                                                              |
| ρ <sub>calc</sub> [g cm <sup>-3</sup> ]        | 1.941                                                               | 2.002                                                                           | 2.051                                                                                          |
| μ [mm <sup>-1</sup> ]                          | 5.571                                                               | 5.668                                                                           | 5.402                                                                                          |
| F(000)                                         | 636.0                                                               | 656.0                                                                           | 704.0                                                                                          |
| Crystal size [mm <sup>3</sup> ]                | 0.2 × 0.2 × 0.15                                                    | 0.35 × 0.25 × 0.1                                                               | 0.4 × 0.2 × 0.03                                                                               |
| Radiation                                      | Mo Kα<br>(λ = 0.71073)                                              | Mo Kα<br>(λ = 0.71073)                                                          | Mo Kα (λ =<br>0.71073)                                                                         |
| 2θ range for data collection [°]               | 5.436 to 54.966                                                     | 5.128 to 54.964                                                                 | 5.426 to 54.968                                                                                |
| Index ranges                                   | -12 ≤ h ≤ 12,<br>-14 ≤ k ≤ 14,<br>-14 ≤ l ≤ 14                      | -10 ≤ h ≤ 10,<br>-15 ≤ k ≤ 15,<br>-16 ≤ l ≤ 16                                  | -12 ≤ h ≤ 12,<br>-15 ≤ k ≤ 15,<br>-15 ≤ l ≤ 15                                                 |
| Reflections collected                          | 17566                                                               | 34564                                                                           | 25541                                                                                          |
| Independent reflections                        | 5143<br>[R <sub>int</sub> = 0.0419,<br>R <sub>sigma</sub> = 0.0442] | 5144<br>[R <sub>int</sub> = 0.0838,<br>R <sub>sigma</sub> = 0.0435]             | 5360<br>[R <sub>int</sub> = 0.0746,<br>R <sub>sigma</sub> = 0.0507]                            |
| Data/restraints/parameters                     | 5143/0/302                                                          | 5144/0/303                                                                      | 5360/1/333                                                                                     |
| Goodness-of-fit on F <sup>2</sup>              | 1.050                                                               | 1.069                                                                           | 1.035                                                                                          |
| Final R indexes [I ≥ 2σ (I)]                   | R <sub>1</sub> = 0.0250,<br>wR <sub>2</sub> = 0.0483                | R <sub>1</sub> = 0.0283,<br>wR <sub>2</sub> = 0.0672                            | R <sub>1</sub> = 0.0359,<br>wR <sub>2</sub> = 0.0815                                           |
| Final R indexes [all data]                     | R <sub>1</sub> = 0.0304,<br>wR <sub>2</sub> = 0.0507                | R <sub>1</sub> = 0.0331,<br>wR <sub>2</sub> = 0.0709                            | R <sub>1</sub> = 0.0424,<br>wR <sub>2</sub> = 0.0876                                           |
| Largest diff. peak / hole [e Å <sup>-3</sup> ] | 1.40/-1.11                                                          | 2.04/-1.42                                                                      | 1.79/-1.43                                                                                     |

## Supporting Information

**Table S5.** Selected bond lengths (Å) in *fac*-[Re(CO)<sub>3</sub>] complexes and a diagram of atom notation.

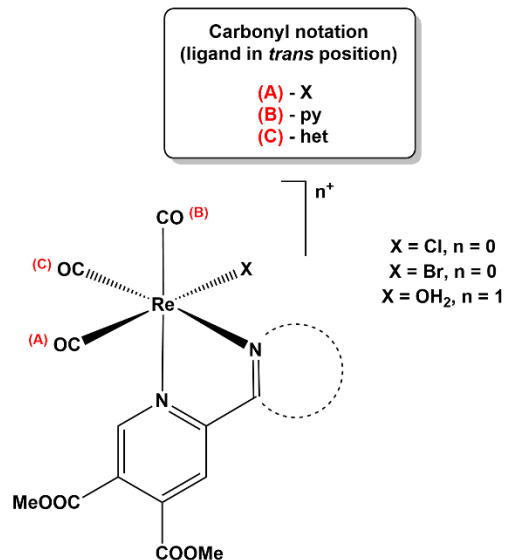

|                                        | 2Cl        | 2Cl <sup>a</sup> | 3Cl        | 4Cl        | 3Br       | 4Br       | 1Aq      | 3Aq      | 4Aq      |
|----------------------------------------|------------|------------------|------------|------------|-----------|-----------|----------|----------|----------|
| Re1-C1A                                | 1.916(6)   | 1.940(6)         | 1.906(7)   | 1.949(5)   | 1.949(6)  | 2.007(6)  | 1.896(4) | 1.903(4) | 1.905(6) |
| C1A-O2A                                | 1.153(6)   | 1.120(6)         | 1.143(8)   | 1.087(5)   | 1.069(6)  | 1.008(7)  | 1.158(4) | 1.151(5) | 1.151(7) |
| Re1-C1B                                | 1.915(5)   | 1.917(5)         | 1.906(6)   | 1.920(5)   | 1.911(5)  | 1.925(5)  | 1.918(4) | 1.920(4) | 1.909(6) |
| C1B-O2B                                | 1.151(6)   | 1.147(6)         | 1.167(7)   | 1.150(5)   | 1.150(5)  | 1.142(6)  | 1.148(4) | 1.143(5) | 1.153(7) |
| Re1-C1C                                | 1.921(5)   | 1.918(5)         | 1.920(6)   | 1.905(5)   | 1.908(5)  | 1.922(5)  | 1.916(3) | 1.916(4) | 1.914(6) |
| C1C-O2C                                | 1.142(6)   | 1.146(6)         | 1.149(7)   | 1.155(5)   | 1.155(6)  | 1.136(6)  | 1.153(4) | 1.151(5) | 1.145(7) |
| Re1-N1 <sub>(py)</sub>                 | 2.182(4)   | 2.180(4)         | 2.185(4)   | 2.194(3)   | 2.178(3)  | 2.196(4)  | 2.172(2) | 2.176(3) | 2.186(4) |
| Re1-N <sub>het</sub>                   | 2.156(4)   | 2.166(4)         | 2.154(5)   | 2.186(4)   | 2.161(4)  | 2.188(4)  | 2.164(3) | 2.179(3) | 2.166(4) |
| Re-X<br>(X = Cl, Br, OH <sub>2</sub> ) | 2.4758(13) | 2.4637(14)       | 2.4773(15) | 2.4621(13) | 2.6109(5) | 2.6024(6) | 2.173(2) | 2.170(3) | 2.174(4) |

<sup>a</sup>The second molecule in the asymmetric unit is marked by \*.

## Supporting Information

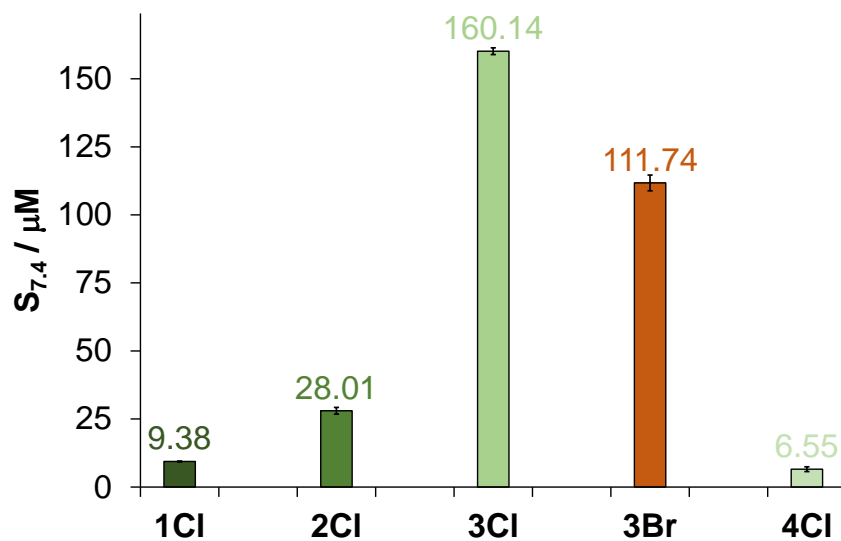

**Figure S13.** Aqueous solubility ( $S_{7.4}$ ) of halido complexes at pH = 7.4 measured after a waiting time of 24 h. {20 mM HEPES buffer; 0.1 M KCl;  $T = 25.0\text{ }^\circ\text{C}$ }

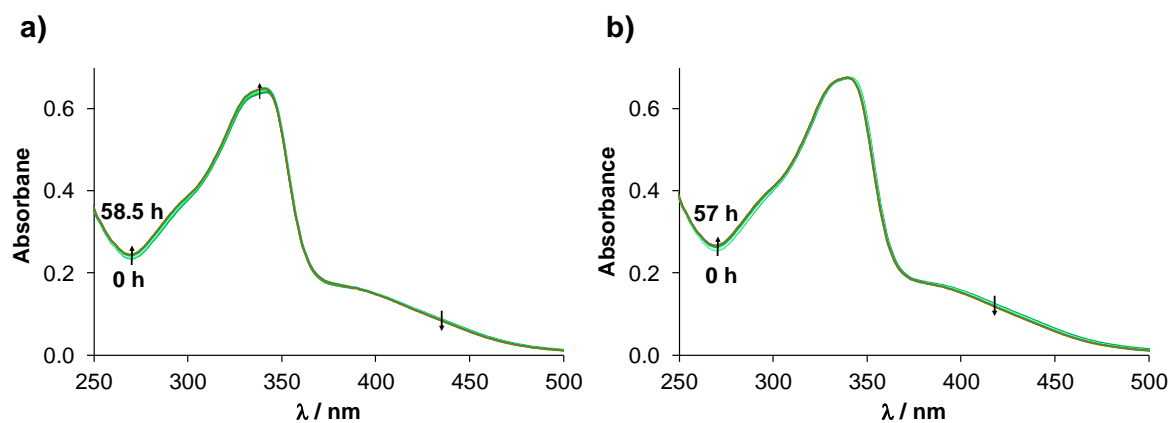

**Figure S14.** UV-vis spectra of (a) chlorido complex **3Cl** and (b) bromido complex **3Br** in aqueous solution over time. { $c_{\text{complex}} = 55\ \mu\text{M}$ ; pH = 6.1;  $\ell = 1\ \text{cm}$ ;  $T = 25.0\text{ }^\circ\text{C}$ }

## Supporting Information

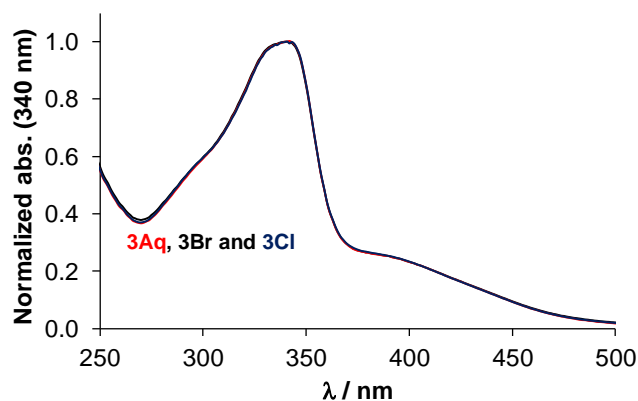

**Figure S15.** Normalized UV-vis spectra of **3Aq**, **3Br** and **3Cl** in aqueous solution. {pH = 6.1;  $\ell$  = 1 cm;  $T$  = 25.0 °C}

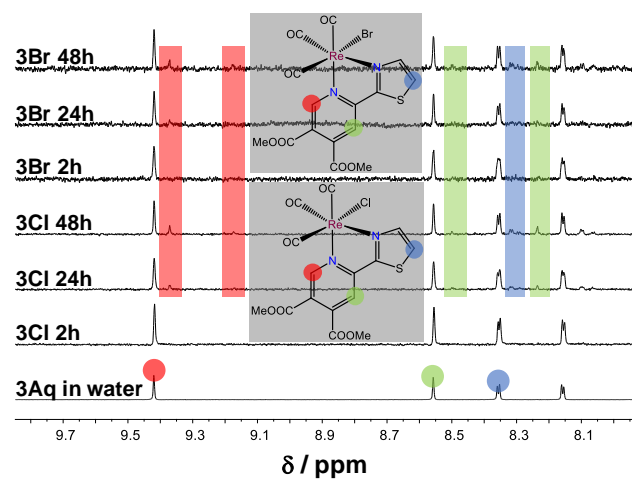

**Figure S16.** <sup>1</sup>H NMR spectra of **3Cl** and **3Br** in water followed in time. Spectrum of **3Aq** is also shown for comparison. The rectangles with coloured background denote to a new peak set, most likely due to the appearance of the species in which the ester bond is partly hydrolysed. { $c_{\text{complex}}$  = 70  $\mu\text{M}$  (**3Cl**) or 40  $\mu\text{M}$  (**3Br**); pH = 6.1; 10% (v/v) D<sub>2</sub>O/H<sub>2</sub>O;  $T$  = 25.0 °C}



## Supporting Information

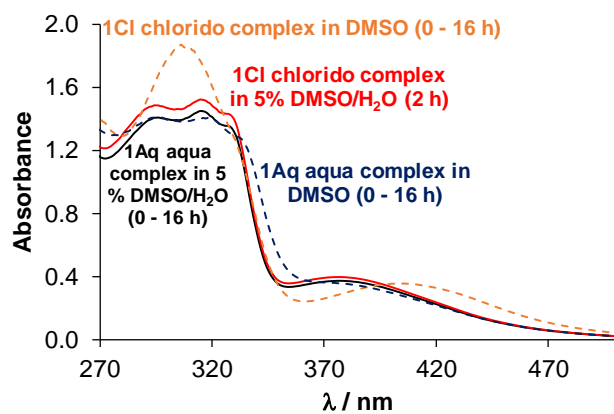

**Figure S17.** UV-vis spectra of aqua **1Aq** and chlorido **1Cl** complex in DMSO (dashed lines) and 5% (v/v) DMSO/H<sub>2</sub>O (pH ~ 6.2) (solid lines).  $\{c_{\text{complex}} = 50 \mu\text{M}; \ell = 1 \text{ cm}; T = 25.0 \text{ }^\circ\text{C}\}$

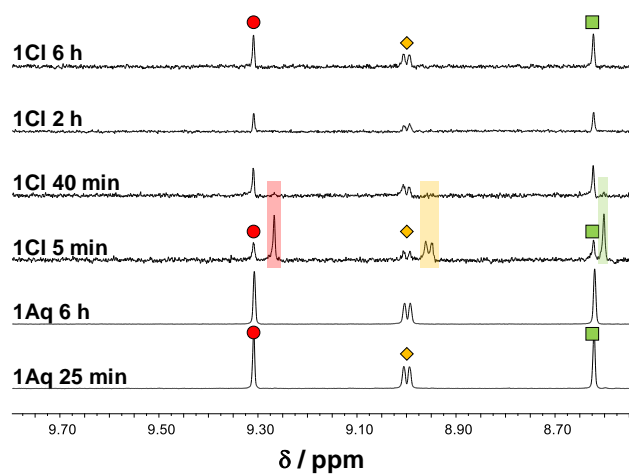

**Figure S18.** <sup>1</sup>H NMR spectra of **1Aq** and **1Cl** in 5% (v/v) DMSO-*d*<sub>6</sub>/H<sub>2</sub>O followed in time. Rectangles indicate the presence of chlorido complex.  $\{c_{\text{complex}} = 500 \mu\text{M}; T = 25.0 \text{ }^\circ\text{C}\}$

## Supporting Information

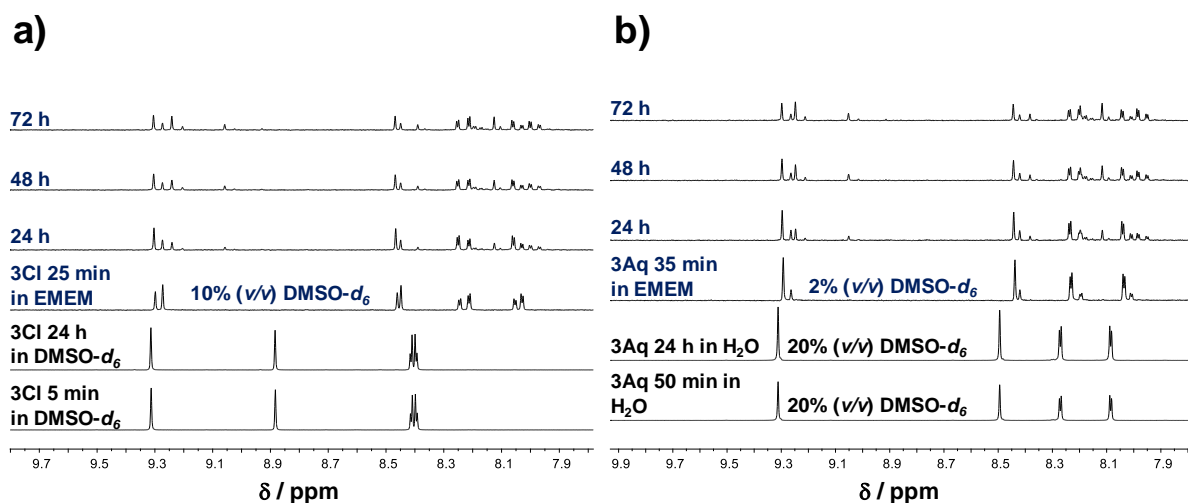

**Figure S19.**  $^1\text{H}$  NMR spectra of (a) **3Cl** and (b) **3Aq** DMSO- $d_6$  and 20% (v/v) DMSO- $d_6$ /H $_2$ O medium, respectively, followed in time. Then the solutions were ten-fold-diluted with EMEM and  $^1\text{H}$  NMR spectra were followed in time.  $\{c_{\text{complex}} = 500 \mu\text{M}; T = 25.0 \text{ }^\circ\text{C}\}$

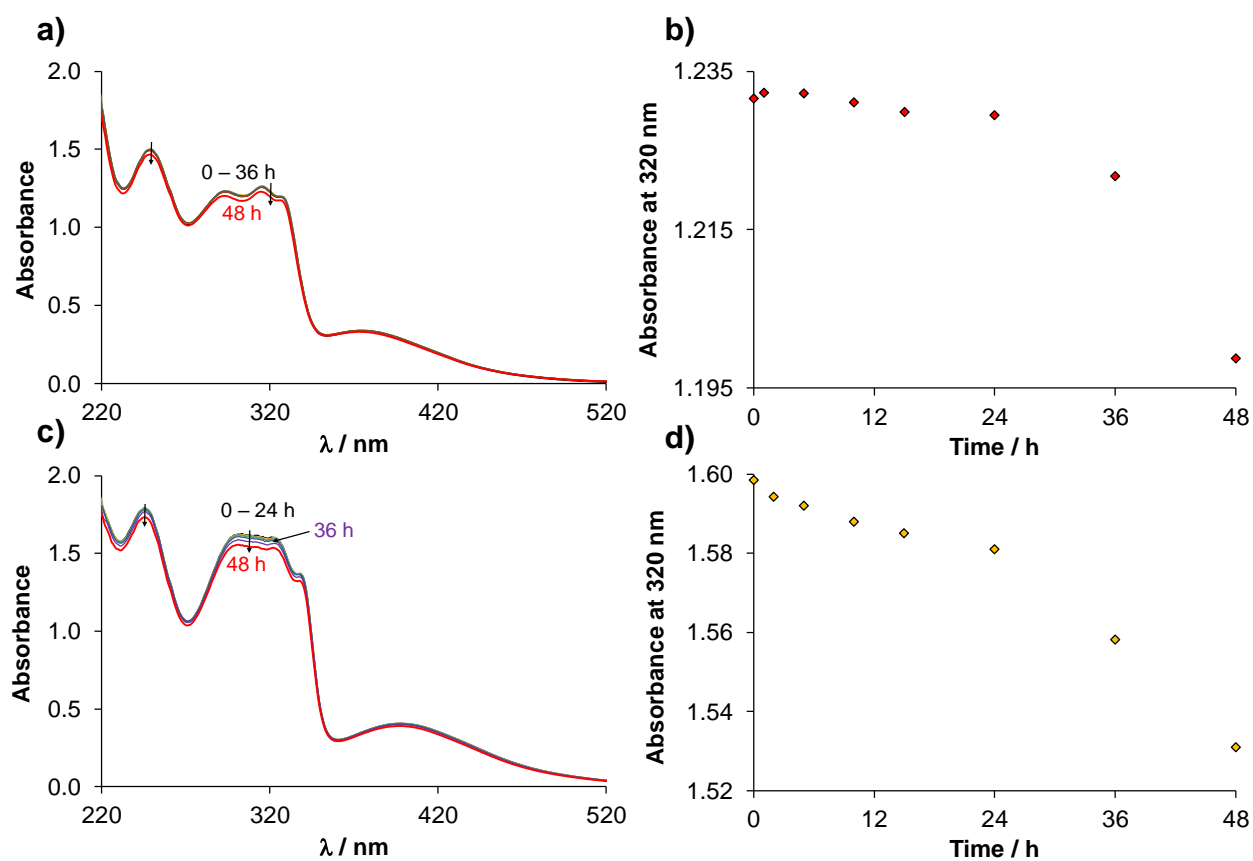

**Figure S20.** UV-vis spectra of (a) **1Aq** and (c) **2Aq** in water followed over time. Absorbance values at 320 nm ( $\diamond$ ) plotted against time (b, d) for the same complexes, respectively.  $\{c_{\text{complex}} = 100 \mu\text{M}; \text{pH} \sim 6.2; \ell = 1 \text{ cm}; T = 25.0 \text{ }^\circ\text{C}\}$

## Supporting Information

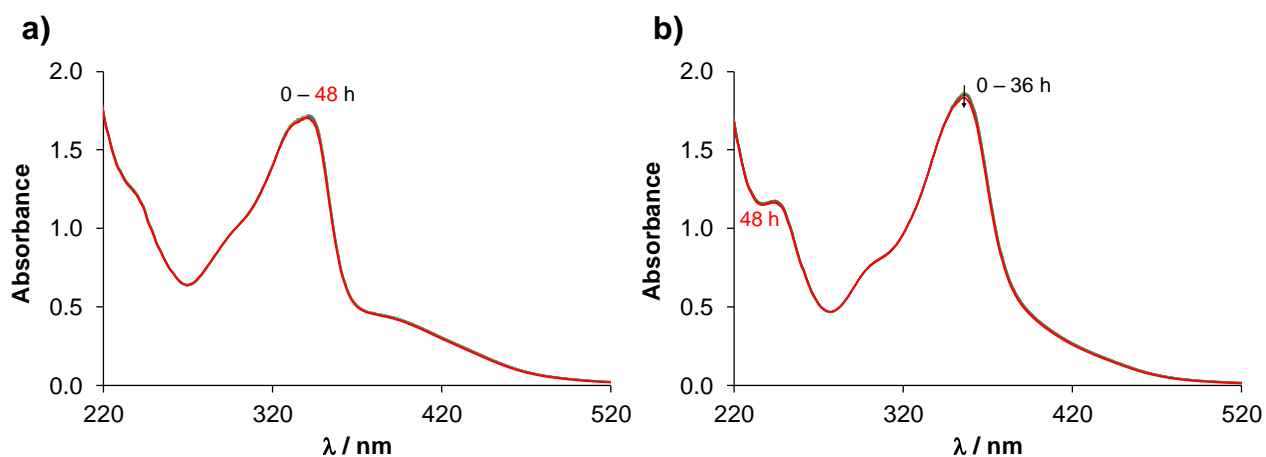

**Figure S21.** UV-vis spectra of (a) **3Aq** and (b) **4Aq** in water followed in time. { $c_{\text{complex}} = 100 \mu\text{M}$ ; pH  $\sim 6.2$ ;  $\ell = 1 \text{ cm}$ ;  $T = 25.0 \text{ }^\circ\text{C}$ }

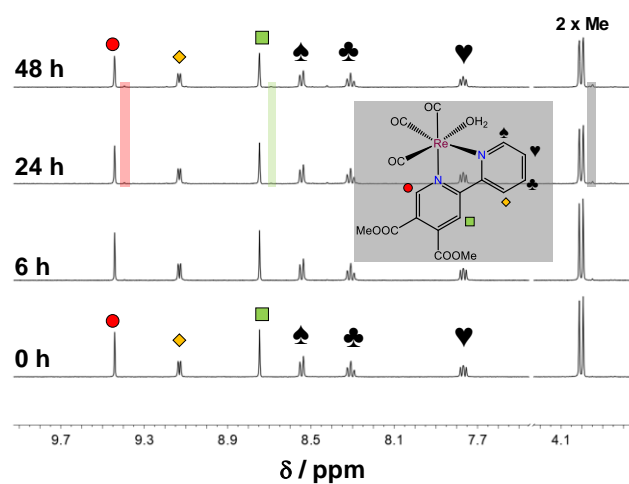

**Figure S22.**  $^1\text{H}$  NMR spectra of **1Aq** in water followed over time. Rectangles with coloured background show the appearance of a new set of peaks. { $c_{\text{complex}} = 500 \mu\text{M}$ ; pH = 6.8; 10% (v/v)  $\text{D}_2\text{O}/\text{H}_2\text{O}$ ;  $T = 25.0 \text{ }^\circ\text{C}$ }

## Supporting Information

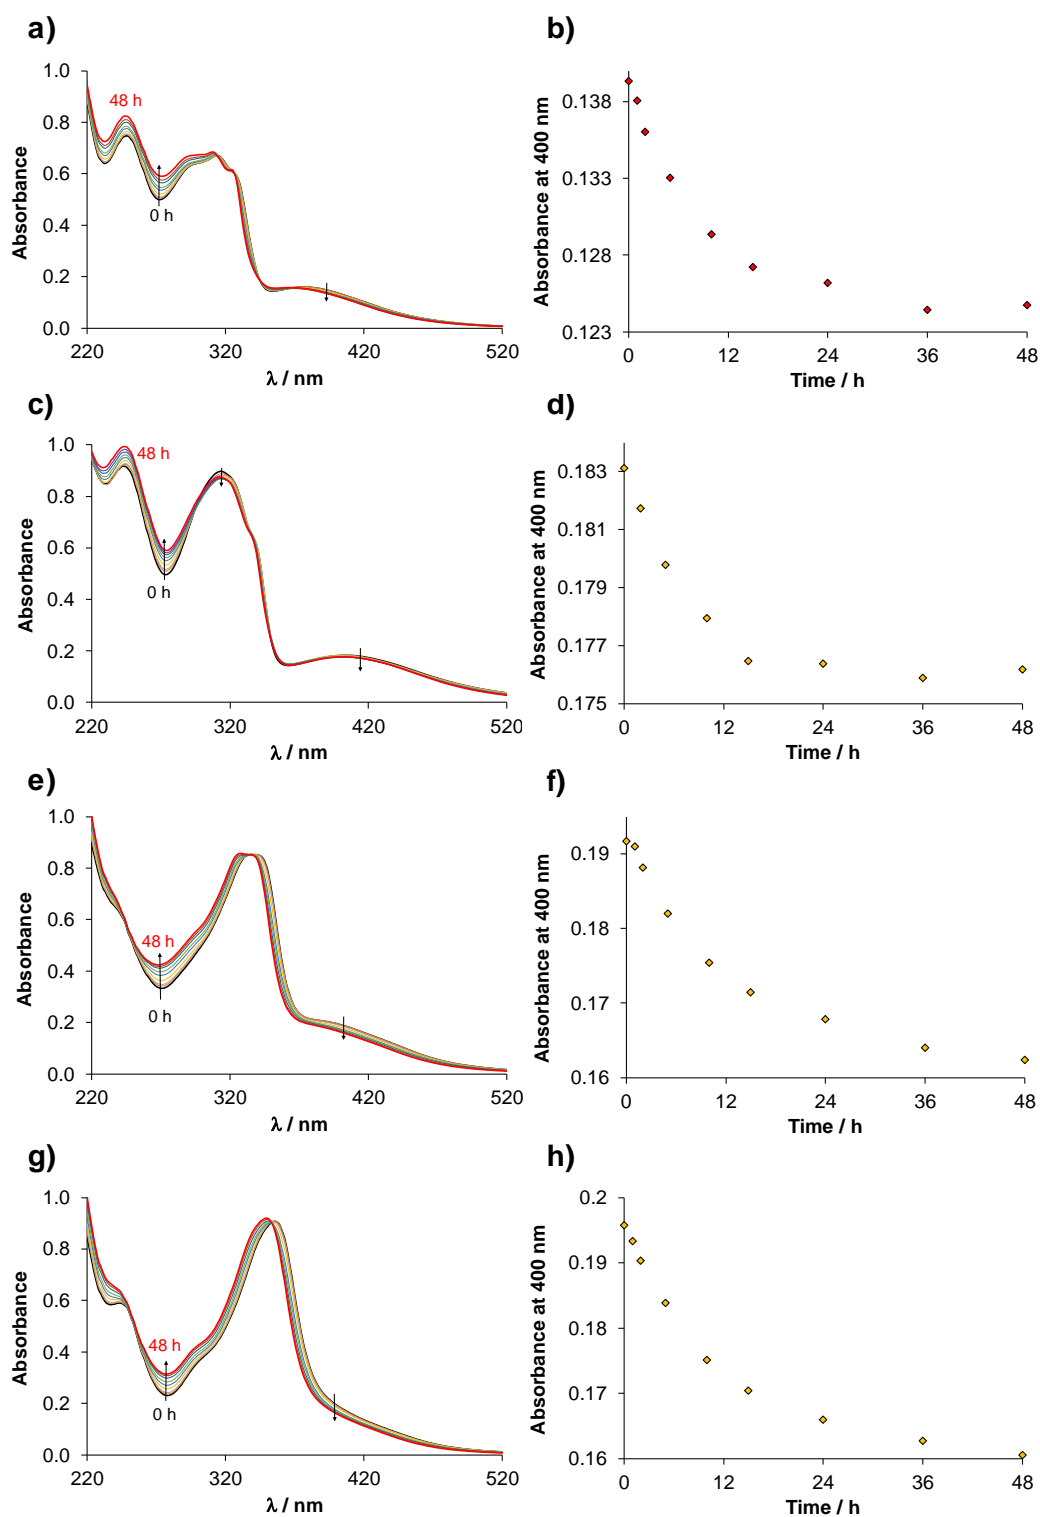

**Figure S23.** UV-vis spectra of (a) **1Aq**, (c) **2Aq**, (e) **3Aq** and (g) **4Aq** in phosphate buffer (20 mM, pH = 7.4) followed over time. Absorbance values at 400 nm ( $\diamond$ ) plotted against time (b, d, f, h) for the same complexes, respectively.  $\{c_{\text{complex}} = 50 \mu\text{M}; \text{pH} = 7.4; \ell = 1 \text{ cm}; T = 25.0 \text{ }^\circ\text{C}\}$

## Supporting Information

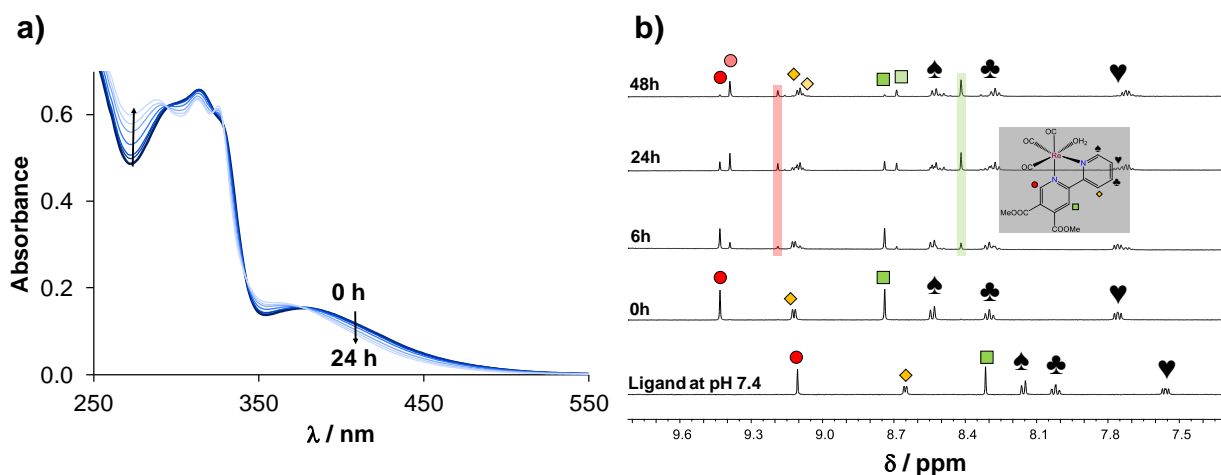

**Figure S24.** (a) UV-vis and (b)  $^1\text{H}$  NMR spectra in the low-field region of **1Aq** in HEPES buffer followed in time. The  $^1\text{H}$  NMR spectrum of the ligand at pH = 7.4 is also shown, and rectangles with coloured background denote to a new peak set.  $\{c_{\text{complex}} = 50 \mu\text{M}$  (UV-vis) or  $500 \mu\text{M}$  ( $^1\text{H}$  NMR); pH = 7.4;  $\ell = 1 \text{ cm}$  (UV-vis); 10% (v/v)  $\text{D}_2\text{O}/\text{H}_2\text{O}$  ( $^1\text{H}$  NMR);  $T = 25.0 \text{ }^\circ\text{C}\}$

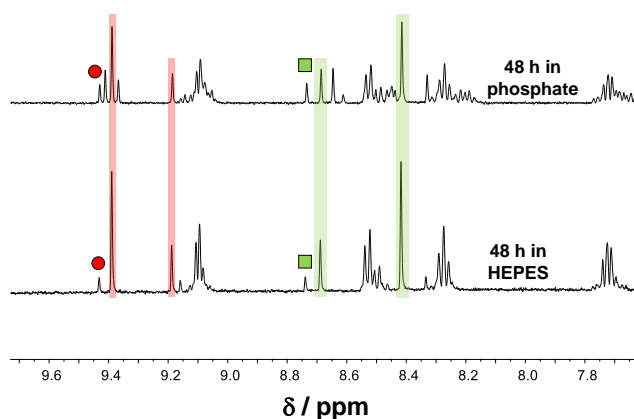

**Figure S25.**  $^1\text{H}$  NMR spectra in the low-field region of **1Aq** at pH = 7.4 after 48 h, using either phosphate (20 mM) or HEPES (10 mM) buffer. Rectangles indicate the appearance of hydrolysed products.  $\{c_{\text{complex}} = 500 \mu\text{M}$ ; pH = 7.4; 10% (v/v)  $\text{D}_2\text{O}/\text{H}_2\text{O}$ ;  $T = 25.0 \text{ }^\circ\text{C}\}$

## Supporting Information

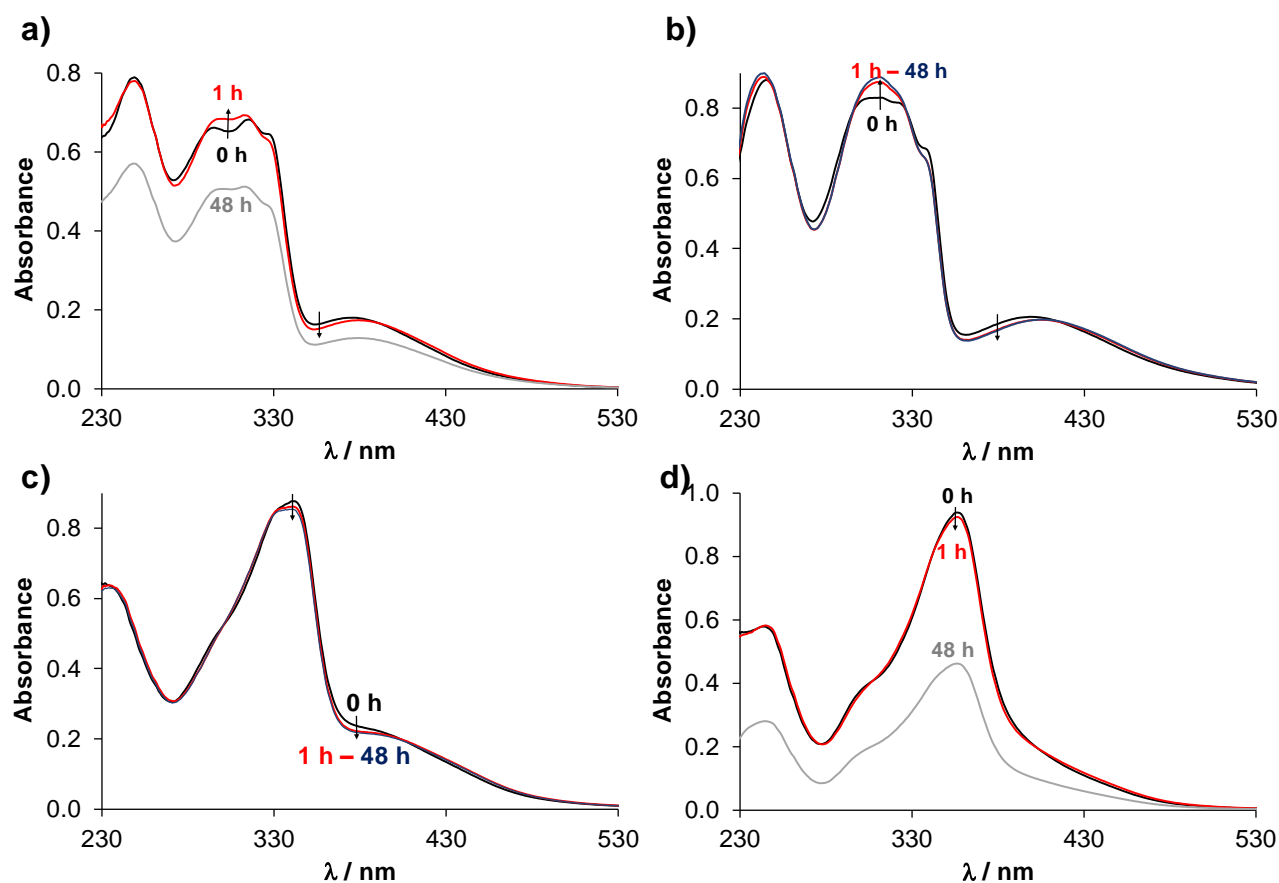

**Figure S26.** UV-vis spectra of (a) **1Aq**, (b) **2Aq**, (c) **3Aq** and (d) **4Aq** in EMEM at 0, 1 h and 48 h.  $\{c_{\text{complex}} = 50 \mu\text{M}; \ell = 1 \text{ cm}; T = 25.0 \text{ }^\circ\text{C}\}$

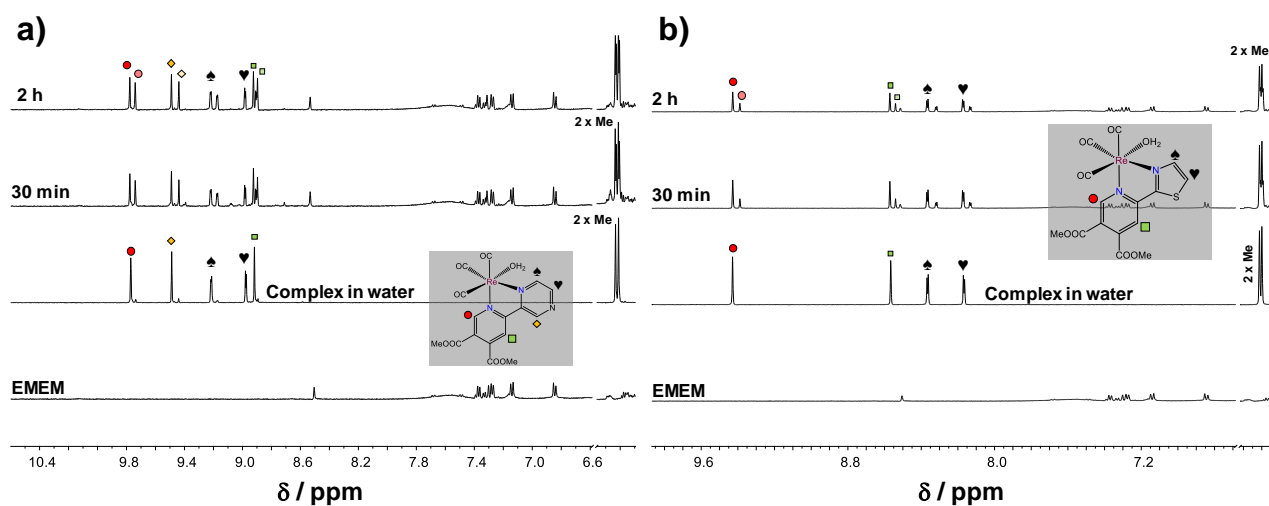

**Figure S27.**  $^1\text{H}$  NMR spectra of (a) **2Aq** and (b) **3Aq** in EMEM after 30 min and 2 h.  $^1\text{H}$  NMR spectra of EMEM and the original complex in water are also shown.  $\{c_{\text{complex}} = 500 \mu\text{M}; \text{pH} = 7.4; 10\% \text{ (v/v) } \text{D}_2\text{O}/\text{H}_2\text{O}; T = 25.0 \text{ }^\circ\text{C}\}$

## Supporting Information

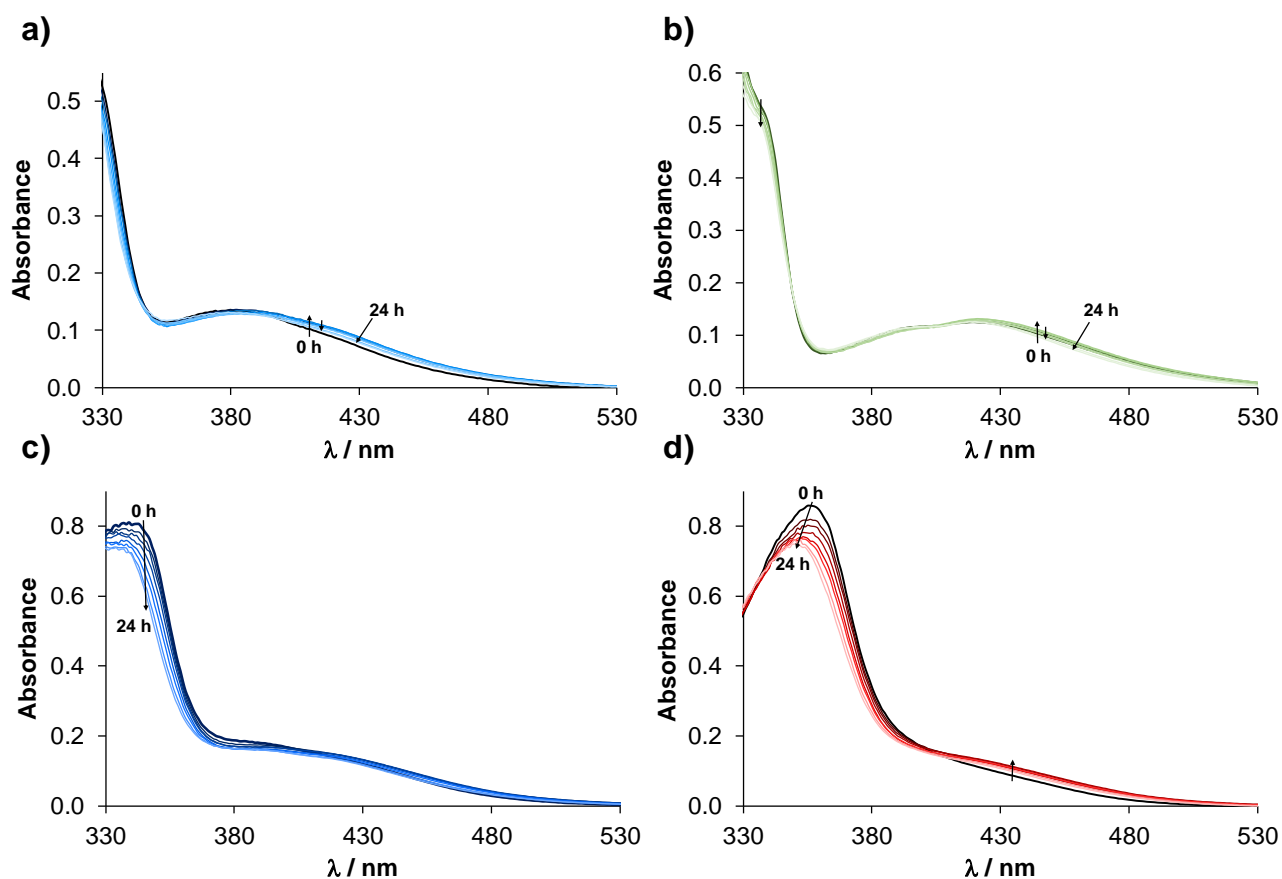

**Figure S28.** UV-vis spectra of (a) **1Aq**, (b) **2Aq**, (c) **3Aq** and (d) **4Aq** in blood serum followed over time. { $c_{\text{complex}} = 50 \mu\text{M}$ ; 4-fold diluted blood serum with PBS' buffer (pH = 7.4);  $\ell = 1 \text{ cm}$ ;  $T = 25.0 \text{ }^\circ\text{C}$ }

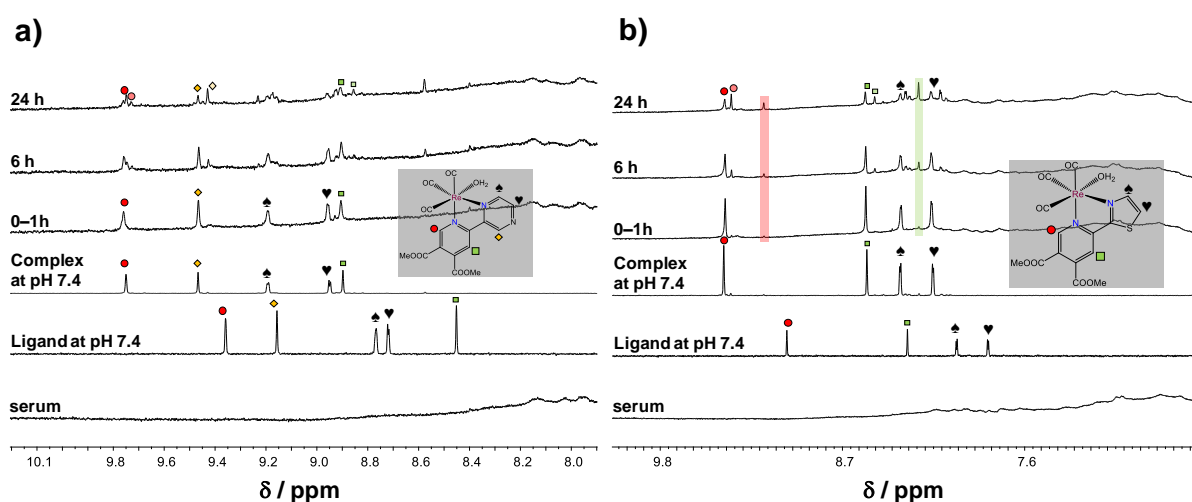

**Figure S29.**  $^1\text{H}$  NMR spectra of (a) **2Aq** and (b) **3Aq** in blood serum followed over time.  $^1\text{H}$  NMR spectra of serum, ligand and complex at pH 7.4 are also shown. Rectangles with coloured background show a new set of peaks. { $c_{\text{complex}} = 500 \mu\text{M}$ ; 4-fold diluted blood serum with PBS' buffer (pH = 7.4); 10% (v/v)  $\text{D}_2\text{O}/\text{H}_2\text{O}$ ;  $T = 25.0 \text{ }^\circ\text{C}$ }

## Supporting Information

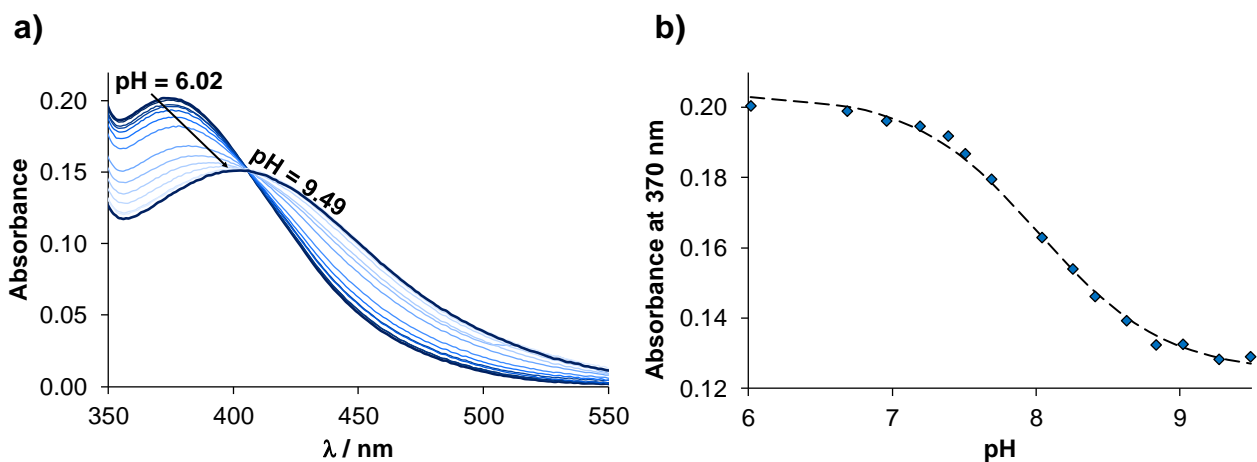

**Figure S30.** (a) UV-vis spectra of aqua complex **1Aq** in water at increasing pH values (6.02  $\rightarrow$  9.49) and (b) absorbance values at 370 nm ( $\blacklozenge$ ) plotted against pH along with the fitted curve (dashed line).  $\{c_{\text{complex}} = 55 \mu\text{M}; I = 0.1 \text{ M KNO}_3; \ell = 1 \text{ cm}; T = 25.0 \text{ }^\circ\text{C}\}$

**Table S6.** Ratio (%) of the aqua and hydroxido (deprotonated form) complexes (**1–4Aq**) at pH = 7.4 based on the  $pK_a(\text{H}_2\text{O})$  values of the complexes determined by UV-vis spectrophotometric titrations (Table 2).  $\{I = 0.1 \text{ M KNO}_3; T = 25.0 \text{ }^\circ\text{C}\}$

| Complex    | Aqua complex (%) | Hydroxido complex (%) |
|------------|------------------|-----------------------|
| <b>1Aq</b> | 82               | 18                    |
| <b>2Aq</b> | 70               | 30                    |
| <b>3Aq</b> | 81               | 19                    |
| <b>4Aq</b> | 81               | 19                    |



## Supporting Information

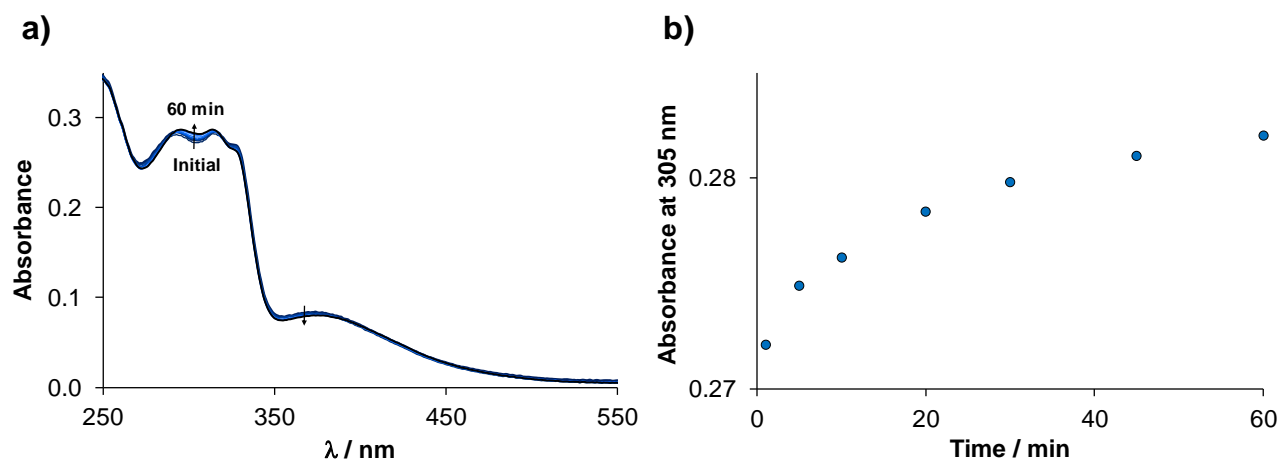

**Figure S31.** UV-vis spectra of (a) **1Aq** in the presence of chloride ions followed over time. Absorbance values at 305 nm (●) plotted against time (b) for the same complex.  $\{c_{\text{complex}} = 25 \mu\text{M}; c_{\text{Cl}^-} = 50 \text{ mM}; \text{pH} = 6.1; \ell = 1 \text{ cm}; T = 25.0 \text{ }^\circ\text{C}\}$

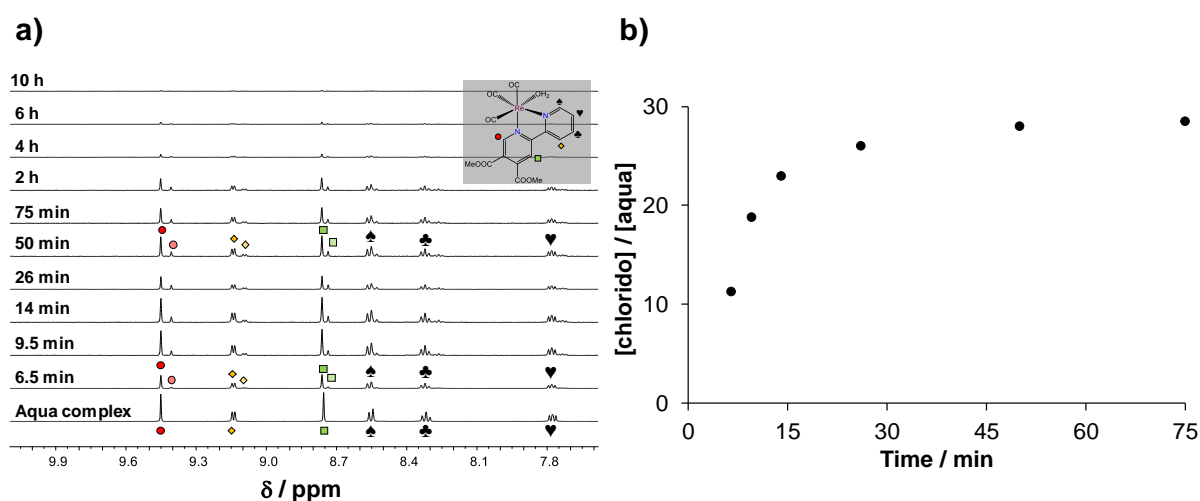

**Figure S32.** (a)  $^1\text{H}$  NMR spectra of **1Aq** in the presence of chloride ions followed over time. (6.5 min – 10 h). (b) Ratio of the concentration of the chlorido and aqua complexes plotted against time. (The ratio was obtained on the basis of the integration of the corresponding peaks of the chlorido and aqua complexes).  $\{c_{\text{complex}} = 500 \mu\text{M}; c_{\text{Cl}^-} = 100 \text{ mM}; \text{pH} = 6.0; 10\% \text{ (v/v) } \text{D}_2\text{O}/\text{H}_2\text{O}; T = 25.0 \text{ }^\circ\text{C}\}$

## Supporting Information

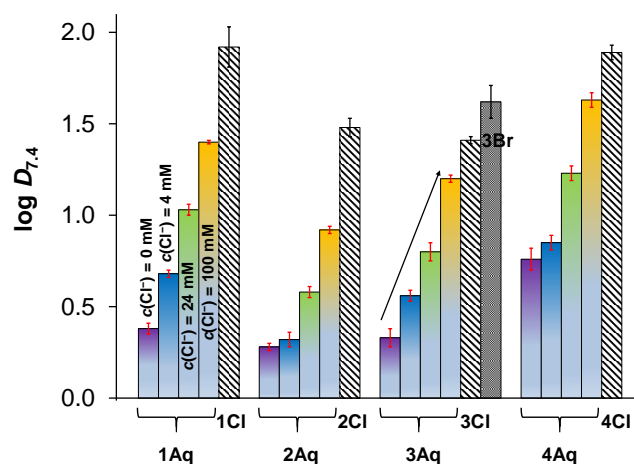

**Figure S33.** Lipophilicity of the studied complexes expressed as  $\log D_{7.4}$  measured via *n*-octanol/buffered aqueous solution partitioning at pH = 7.4 (HEPES buffer). For the aqua complexes measurements were done in the absence (0 mM) and in the presence of chloride ions (4, 24 and 100 mM, relevant to the different biofluids).  $\log D_{7.4}$  values for halido complexes obtained at 0.1 M KCl and the compounds were previously dissolved in the saturated *n*-octanol phase.  $\{c_{\text{complex}} = 50 - 100 \mu\text{M}; \text{incubation time: } 4 \text{ h}; T = 25.0 \text{ }^\circ\text{C}\}$

## Supporting Information

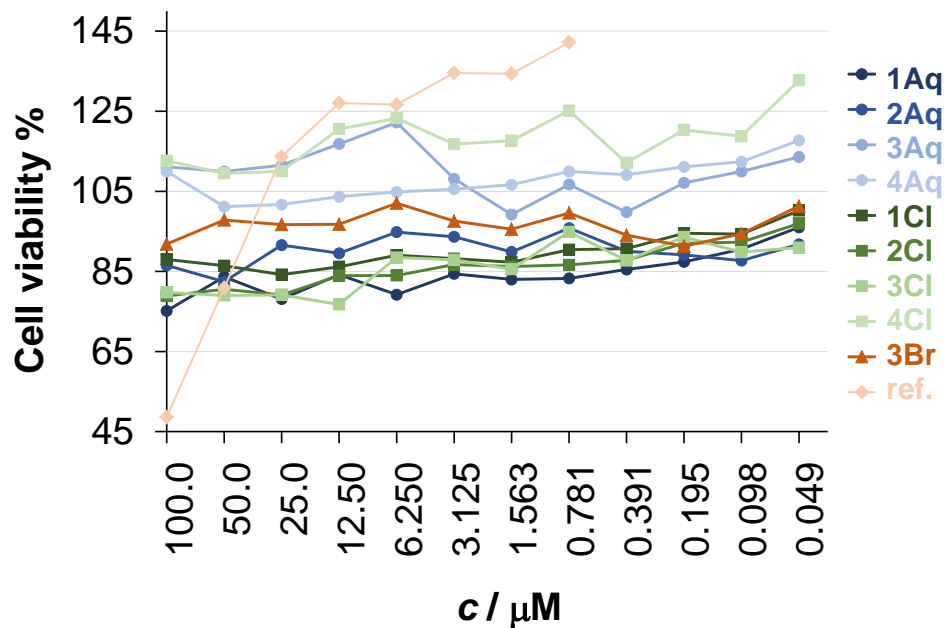

**Figure S34.** Cytotoxicity of the complexes against Vero cells: no significant toxicity at any of the applied concentrations. 50  $\mu\text{M}$  of complex **1Aq** was found as maximum non-toxic concentration, whereas 100  $\mu\text{M}$  for all other complexes. As a comparison, the reference complex *fac*- $[\text{Re}(\text{CO})_3(\text{bpy})(\text{Cl})]$  (ref.) was also involved. {Incubation time: 24 h.}

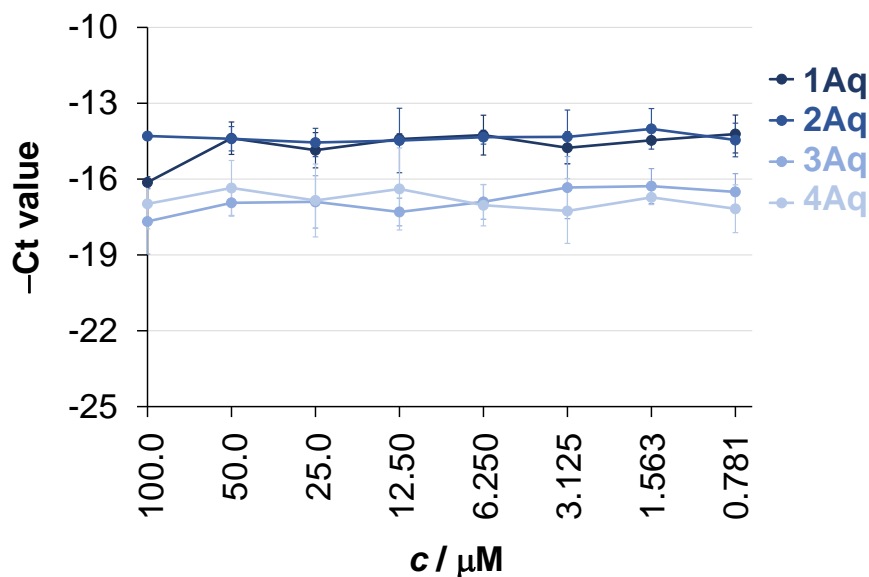

**Figure S35.** Antiviral effect of complexes **1–4Aq** against HSV-2 at different concentrations. The HSV-2 DNA concentration was measured by direct qPCR. Data represent the average  $-\text{Ct}$  values  $\pm$  standard deviations. {Treatment of the Vero cells: 24 h;  $n = 3$ }

## Supporting Information

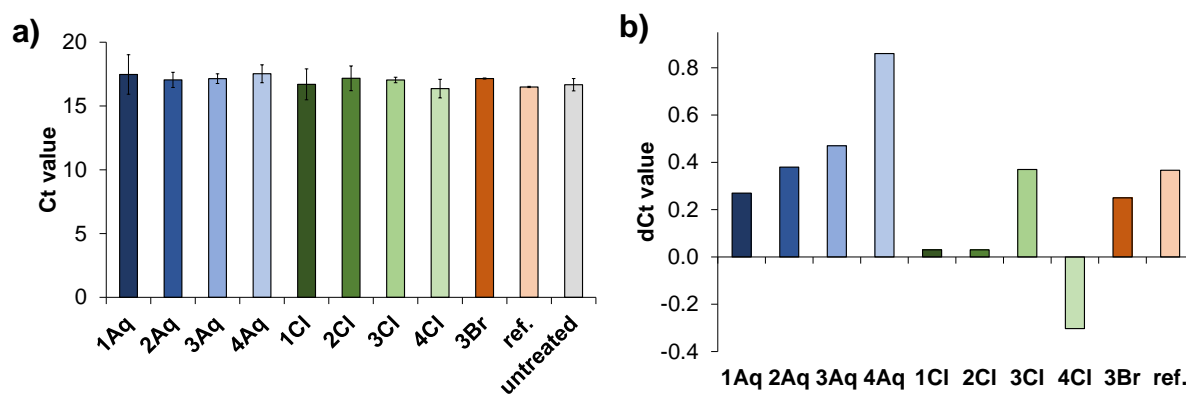

**Figure S36.** (a) Ct and (b) dCt values when the direct impact of the complexes on the DNA polymerase of qPCR was monitored. Lysates from cells that were treated with the complexes, both infected and uninfected, were mixed in a 1:1 ratio, and the resulting Ct levels were similar to those obtained when lysates from HSV-2 infected cells and uninfected cells were mixed in the same ratio, thus the Ct levels remained consistent regardless of the treatment. As a comparison, the reference complex *fac*-[Re(CO)<sub>3</sub>(bpy)(Cl)] (ref.) was also involved.
